# Supplementary material for: Cyclization cascade of the C33-bisnorheptaprenoid catalyzed by recombinant squalene cyclase
Source: Royal Society of Chemistry journal article supplement (doi:10.1039/b823167b), 2009-01-01

## Electronic Supplementary Information

### Cyclization cascade of the C<sub>33</sub>-bisorheptaprenoid catalyzed by recombinant squalene cyclase

Jun Cheng and Tsutomu Hoshino\*

*Department of Applied Biological Chemistry, Faculty of Agriculture and Graduate School of Science and Technology, Niigata University, Ikarashi 2, Nishi-ku, Niigata 950-2181, Japan*

#### Contents

Synthesis of (6*E*, 10*E*, 14*E*, 17*E*, 21*E*)-5,9,13,18, 22,26-hexamethyltricosane-1,5,9,13, 17,21-hexanene **14** S2-S3

EIMS spectra and the analyses of NMR data of products **20-35**, and <sup>1</sup>H and <sup>13</sup>C NMR spectra of products **20-35** together with 2D NMR spectra of product **29** S4-S56

**Synthesis of (6E, 10E, 14E, 17E, 21E)-5,9,13,18, 22,26-hexamethyltricoso-1,5,9,13, 17,21-hexanene 14**

Allylic alcohol **16** was prepared according to the published method (F. W. Sum and L. Weiler, *Tetrahedron*, 1981, **37**, 303-317). Squalene **1** (72.61g, 177mmol) and salicylic acid (2.45g, 17.7mmol) were suspended in 360ml of CH<sub>2</sub>Cl<sub>2</sub>, and cooled at 0°C. To the suspension was added a mixture of SeO<sub>2</sub> (3.93g, 35.4mmol) and 45.6 g of *n*-BuOOH (70 wt% in H<sub>2</sub>O: *n*-BuOOH used was 31.9g, 0.35mol) in a dropwise manner under atmosphere of N<sub>2</sub> gas, and stirred for 1.5 h, followed by addition of aq. Na<sub>2</sub>SO<sub>3</sub> to quench the reaction. The hexane-extract from the reaction mixture was dried over anhyd. Na<sub>2</sub>SO<sub>4</sub> and then purified by a SiO<sub>2</sub> column chromatography (hexane:EtOAc=100:5~100:10), yielding the desired **16** (8.24g, 10.9% yield). NMR data of **16** in C<sub>6</sub>D<sub>6</sub>: <sup>1</sup>H (400 MHz), 5.50 (1H, t, *J*=6.8 Hz), ~5.41 (5H, m), 3.93 (2H, s), 2.37~2.16 (20H, m), 1.798 (3H, s), 1.731 (6H, s), 1.722 (3H, s), 1.713(3H, s), 1.689 (3H, s), 1.685 (3H,s); δ<sub>C</sub> (100 MHz), 135.4 (s), 135.2 (s), 135.1 (s), 134.9 (s), 134.7 (s), 131.1 (s), 125.3 (d), 124.95 (d), 124.93 (d), 124.9 (d), 124.8 (d), 124.79 (d), 68.73 (t), 40.21 (t, 3xC), 39.86 (t), 28.74 (t, 2xC), 27.22 (t), 27.09 (t, 2xC), 26.66 (t), 25.84 (q), 17.79 (q), 16.16 (q, 2xC), 16.09 (q, 2xC), 13.64 (q).

To the solution of compound **16** (4.13g, 9.7mmol) in dry THF (205ml) at 0°C was added in a dropwise fashion the solution of PBr<sub>3</sub> (3.94g, 14.55mmol) in 1.5 ml of THF, and stirred for 30 min. To the reaction mixture was added saturated brine, followed by extraction with hexane, which was dried over Na<sub>2</sub>SO<sub>4</sub>, giving **17** (4.5g), and used without further purification. To a mixture of PheSO<sub>2</sub>Na·H<sub>2</sub>O (1.8g, 11mmol) and DMF (90ml), was added compound **17** ((3.6g, 7mmol)) in a small portion and then the reaction continued for 1.5-2h. The reaction mixture was poured into ice-cooled saturated brine, and extracted with hexane. The hexane-extract was dried over anhyd. Na<sub>2</sub>SO<sub>4</sub>, and then subjected to SiO<sub>2</sub> column chromatography eluting with hexane:EtOAc (10:1), affording a pure **18** (1.20g, 29.4% yield). NMR data of **18** in CDCl<sub>3</sub>: δ<sub>H</sub> (400 MHz), 7.83(2H, ddd, *J*=7.2, 1.6, 1.6 Hz), 7.60(1H, ddd, *J*=7.2, 7.2, 1.6 Hz), 7.52(2H, ddd, *J*=7.2,7.2,1.6 Hz), 5.09(4H, m), 5.01(2H, m), 3.70(2H, s), 2.09-1.94 (20H, m), 1.75(3H, s), 1.67(3H, s), 1.59(12H, s, 4×CH<sub>3</sub>), 1.52(3H, s); δ<sub>C</sub> (100 MHz), 138.3 (s), 135.9 (d), 135.0 (s), 134.9 (s), 134.8 (s), 133.9 (s), 133.4 (d), 131.1 (s), 128.8 (d, 2xC), 128.4(d, 2xC), 124.7 (d), 124.3 (d), 124.27 (d), 124.2 (d, 2xC), 123.1 (s), 66.16 (t), 39.66 (t), 39.64 (t), 39.58 (t), 38.51(t),

28.19(t, 2xC), 26.86(t), 26.68 (t), 26.56 (t), 26.53 (t), 25.61 (q), 17.59(q), 16.57(q), 15.96(q, 2xC), 15.92(q), 15.80(q).

Compound **18** (1.2 g, 2mmol) was dissolved in 60ml of THF:[(CH<sub>3</sub>)<sub>2</sub>N]<sub>3</sub>PO (4:1) at -40°C under N<sub>2</sub> gas. Then *n*-BuLi (1.58M, 4.11ml, 6mmol) was added, giving a brown color, to which the THF solution (1 ml) of allyl bromide (0.4g, 3mmol) was slowly added at -78°C and reacted for 20 min. The reaction mixture was poured into ice-cooled saturated brine, then extracted with hexane, and dried over Na<sub>2</sub>SO<sub>4</sub>. A SiO<sub>2</sub> column chromatography eluting with a mixture of hexane and EtOAc (3~5% EtOAc in hexane) gave pure compound **19** (869.2mg, yield 67.5%). NMR data of **19** in CDCl<sub>3</sub>: <sup>1</sup>H (400 MHz), 7.80(2H, d, *J* = 7.6Hz), 7.61(1H, t, *J* = 7.6Hz), 7.51(2H, t, *J* = 7.6Hz), 5.58(1H, m), 5.12(5H, m), 5.02(3H, m), 3.53(1H, dd, *J* = 11.6, 3.6Hz), 2.86(1H, m), 2.66(1H, m), 2.08-1.90 (20H, m), 1.67 (3H, s), 1.66 (3H, s), 1.59(12H, s, 4×CH<sub>3</sub>), 1.51(3H, s); <sup>13</sup>C (100 MHz), 137.7 (s), 136.1 (d), 135.0 (s), 134.9 (s), 134.8 (s), 133.9 (s), 133.3 (d), 133.2 (d), 131.1 (s), 128.8(d, 2xC), 128.6(d, 2xC), 126.0 (s), 124.6 (d), 124.3 (d), 124.28 (d), 124.2 (d, 2xC), 117.7 (t), 73.65 (d), 39.68 (t), 39.66(t), 39.61 (t), 38.44 (t), 29.45 (t), 28.20(t, 2xC), 26.69 (t), 26.56(t, 3xC), 25.63 (q), 17.61 (q), 15.98(q, 2xC), 15.93(q), 15.77 (q), 13.49 (q).

Compound **19** (869.2mg, 1.47nmol) and C<sub>27</sub>H<sub>26</sub>Cl<sub>2</sub>P<sub>2</sub>Pd (49mg, 0.083nmol) was dissolved in dry Et<sub>2</sub>O (160 ml) at 0°C under N<sub>2</sub> atmosphere. To the solution, super hydride reagent (1.0 M, 20 ml) was added slowly until the deep brown color appears, and reacted for 10 min. The reaction mixture was poured in a dropwise manner into an ice-cooled saturated brine, and then extracted with hexane. The hexane extract was dried over Na<sub>2</sub>SO<sub>4</sub>. The desired C<sub>33</sub> analog **14** was obtained after purifying with SiO<sub>2</sub> column chromatography eluting with hexane (585.6mg, 88.30%). NMR data of **14** in C<sub>6</sub>D<sub>6</sub>: <sup>1</sup>H (400 MHz), 5.79 (1H, m), 5.12 (6H, m), 4.99 (1H, bd, *J*=17.2 Hz), 4.93 (1H, bd, *J*=10.0 Hz), 2.33-1.97 (24H, m), 1.68 (3H, s), 1.60 (18H, s, 6×CH<sub>3</sub>); <sup>13</sup>C (100 MHz), 138.7 (d), 135.1 (s, 2xC), 134.9 (s), 134.8 (s), 134.3 (s), 131.2 (s), 124.6 (d), 124.4 (d), 124.3 (d), 124.28 (d, 2xC), 124.26 (d), 114.2 (t), 39.75(, t, 2xC), 39.72 (t), 39.69 (t), 39.04 (t), 32.37 (t), 28.27 (t, 2xC), 26.75 (t), 26.6t (t, 2xC), 26.59 (t), 25.69 (q), 17.67 (q), 16.04 (q, 2xC), 15.99 (q, 2xC), 15.95 (q). EIMS; *m/z* (%) 67(34), 69 (100), 81 (72), 95(25), 109(40), 121(15), 137 (12), 149 (9), 163(2), 177(2), 203(1), 217(1), 271(1), 299(1), 342(1), 382(1), 408(1), 450(M<sup>+</sup>, 1).

**Product 20**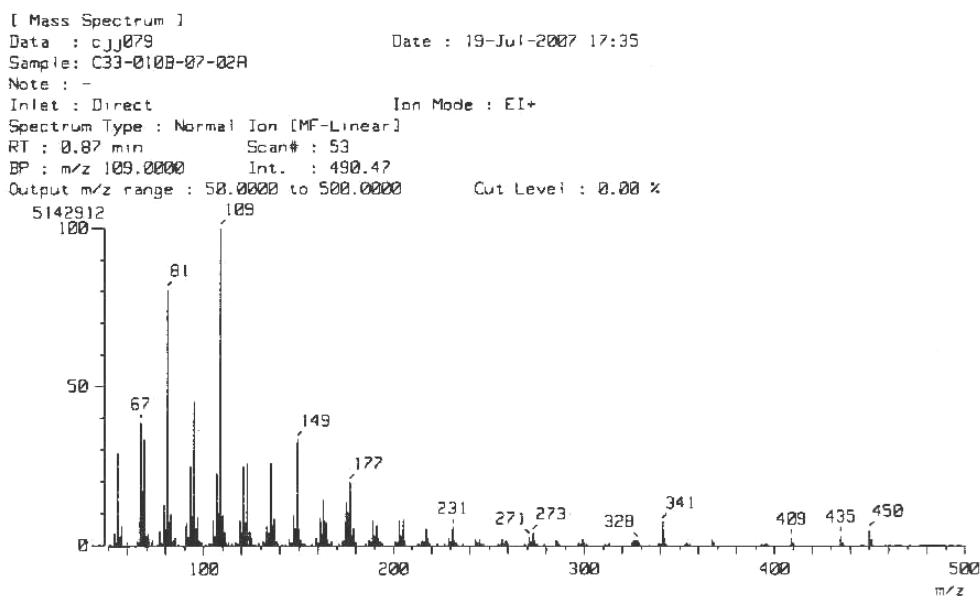**Product 20**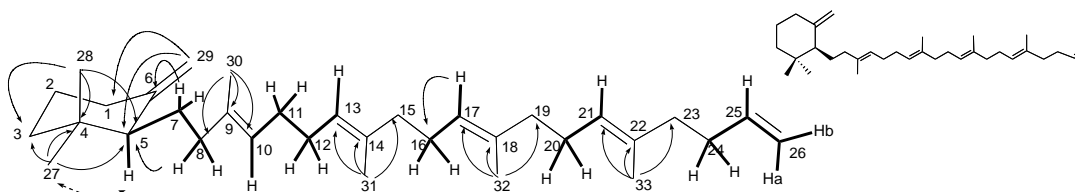

$[\alpha]_D^{25} +8.99$  (EtOH,  $c=0.2$ )

HRMS for calcd. C<sub>33</sub>H<sub>54</sub> (M<sup>+</sup>)450.4226  
 Found 450.4218

400MHz in C<sub>6</sub>D<sub>6</sub>  
 the solvent peak <sup>1</sup>H: 7.28 ppm; <sup>13</sup>C:128.0 ppm

NOE: HMBC:   
 COSY:

| NO. | <sup>1</sup> H           | <sup>13</sup> C | NO. | <sup>1</sup> H | <sup>13</sup> C    | NO. | <sup>1</sup> H     | <sup>13</sup> C    | NO. | <sup>1</sup> H                                        | <sup>13</sup> C    |
|-----|--------------------------|-----------------|-----|----------------|--------------------|-----|--------------------|--------------------|-----|-------------------------------------------------------|--------------------|
| 1   | 2.10(m);2.22(m)          | 32.76           | 9   | —              | 135.7              | 17  | 5.42(1H, t, J=6.8) | 124.6              | 25  | 5.93(1H, m)                                           | 138.8              |
| 2   | 1.61(2H,m)               | 24.07           | 10  | 5.47(m)        | 124.6              | 18  | —                  | 134.9              | 26  | 5.16(1H, bdd, J=16.4, 1.6Hz)<br>5.12(1H, bd, J=10 Hz) | 114.5              |
| 3   | 1.52(1H, m); 1.27(1H, m) | 36.48           | 11  | 2.27(2H,m)     | 28.77              | 19  | 2.22(2H, m)        | 40.16 <sup>a</sup> | 27  | 1.075(3H, s)                                          | 28.57              |
| 4   | —                        | 34.96           | 12  | 2.27(2H,m)     | 28.77              | 20  | 2.30(2H,m)         | 27.03 <sup>b</sup> | 28  | 0.972(3H, s)                                          | 26.51              |
| 5   | 1.86(1H, J=11.4, 3.0)    | 53.84           | 13  | 5.47(m)        | 124.9              | 21  | 5.36(1H, t, J=6.8) | 125.0              | 29  | 5.00(1H,bs); 4.82(1H, bs)                             | 109.4              |
| 6   | —                        | 149.4           | 14  | —              | 135.2              | 22  | —                  | 134.4              | 30  | 1.770(3H, s)                                          | 16.28              |
| 7   | 1.64(m);1.77(m)          | 25.19           | 15  | 2.22(2H, m)    | 40.24 <sup>a</sup> | 23  | 2.17(2H,m)         | 39.45              | 31  | 1.746(3H, s)                                          | 16.19 <sup>c</sup> |
| 8   | 2.05(m);2.23(m)          | 38.68           | 16  | 2.30(2H,m)     | 27.11 <sup>b</sup> | 24  | 2.22(2H,m)         | 32.76              | 32  | 1.731(3H, s)                                          | 16.10 <sup>c</sup> |
|     |                          |                 |     |                |                    |     |                    |                    | 33  | 1.671(3H, s)                                          | 16.01              |

The carbon signals of a-c are exchangeable between the same characters.



<sup>13</sup>C-NMR

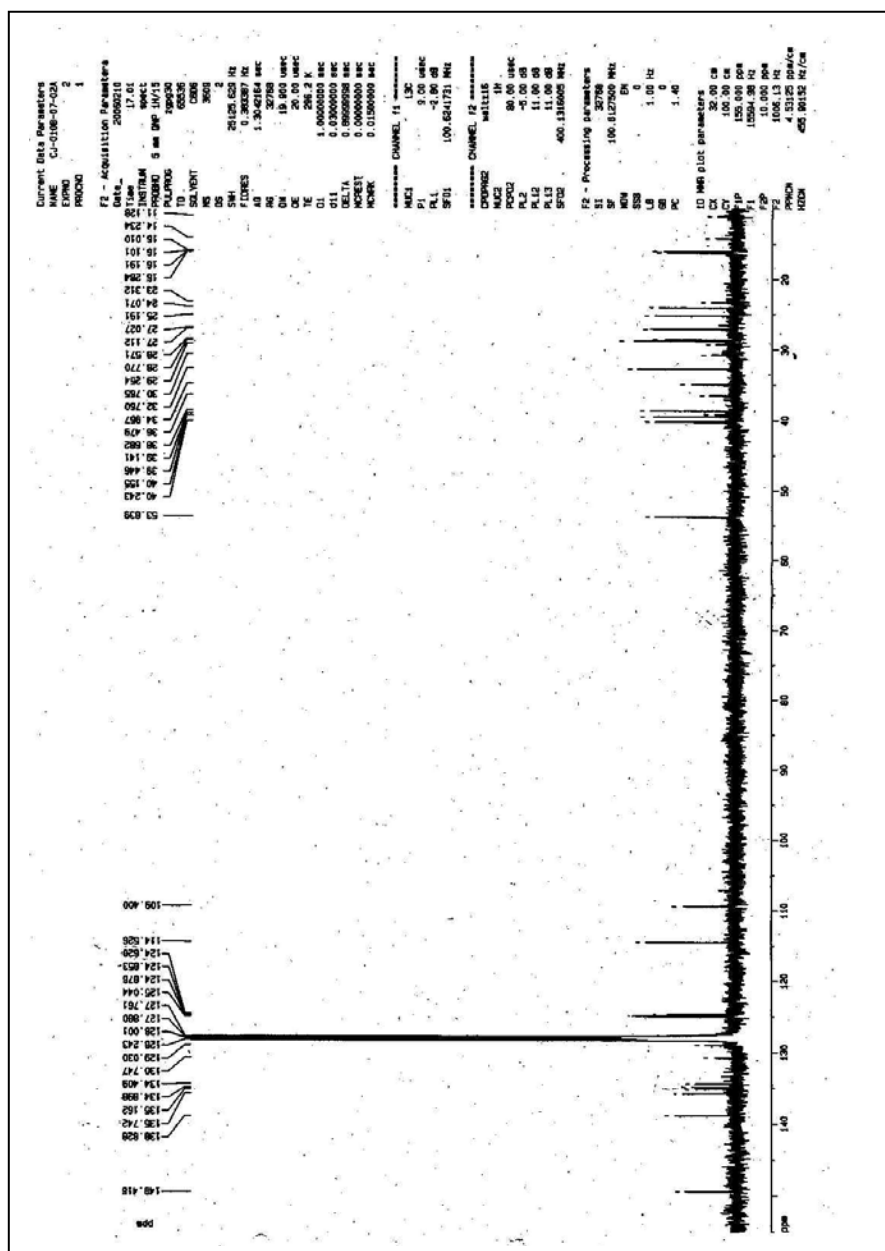

**Product 21**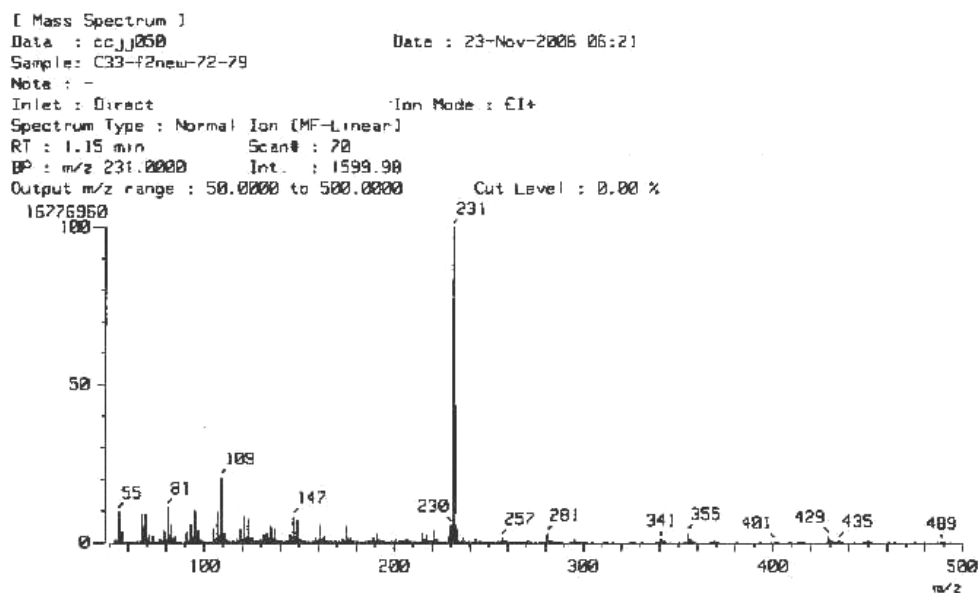**Product 21**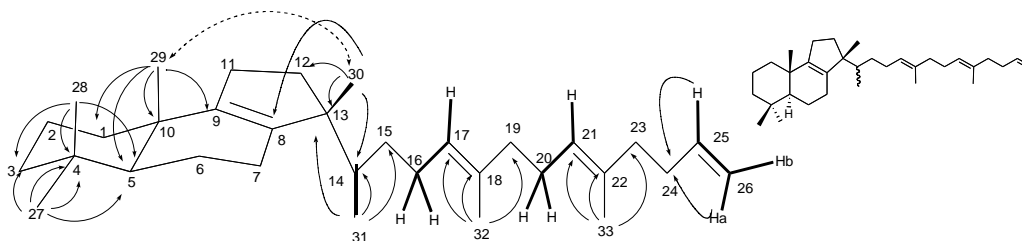

$[\alpha]_D^{25}$  -28.08 (c=0.073, EtOH)

HRMS for calcd.  $C_{33}H_{54}$  ( $M^+$ ) 450.4226  
 Found 450.4227

600 MHz in  $C_6D_6$   
 the solvent peak  $^1H$ : 7.28 ppm;  $^{13}C$ :128.0 ppm

NOE:  $\dashrightarrow$   
 COSY:  $\longrightarrow$  HMBC:  $\dashrightarrow$

| NO. | $^1H$                      | $^{13}C$           | NO. | $^1H$                      | $^{13}C$           | NO. | $^1H$                      | $^{13}C$           | NO. | $^1H$                                                   | $^{13}C$ |
|-----|----------------------------|--------------------|-----|----------------------------|--------------------|-----|----------------------------|--------------------|-----|---------------------------------------------------------|----------|
| 1   | 1.26 (1H, m); 1.72 (1H, m) | 37.83              | 9   | —                          | 144.4              | 17  | 5.46 (1H, t, J=6.6)        | 125.6              | 25  | 5.94 (1H, m)                                            | 138.9    |
| 2   | 1.49 (2H, m)               | 19.34 <sup>a</sup> | 10  | —                          | 36.29              | 18  | —                          | 134.7              | 26  | a:5.17 (1H, bdd, J=17.1, 1.6); b:5.12 (1H, bdd, J=10.1) | 114.5    |
| 3   | 1.29 (1H, m); 1.54 (1H, m) | 42.39              | 11  | 2.27 (1H, m); 2.36 (1H, m) | 28.31              | 19  | 2.25 (2H, m)               | 40.19              | 27  | 1.043 (3H, s)                                           | 33.56    |
| 4   | —                          | 33.27              | 12  | 1.23 (1H, m); 1.85 (1H, m) | 31.28              | 20  | 2.33 (2H, m)               | 27.04 <sup>b</sup> | 28  | 1.010 (3H, s)                                           | 21.75    |
| 5   | 1.33 (1H, bd, J=10.7)      | 52.87              | 13  | —                          | 52.99              | 21  | 5.38 (1H, t, 6.6)          | 125.1              | 29  | 1.132 (3H, s)                                           | 19.69    |
| 6   | 1.49 (2H, m)               | 19.54 <sup>a</sup> | 14  | 1.63 (m)                   | 38.86              | 22  | —                          | 134.5              | 30  | 1.206 (3H, s)                                           | 25.52    |
| 7   | 1.97 (1H, m); 2.12 (1H, m) | 23.75              | 15  | 1.23 (1H, m); 1.82 (1H, m) | 32.27              | 23  | 2.20 (2H, m)               | 39.46              | 31  | 1.00 (3H, d, J=6.0)                                     | 15.05    |
| 8   | —                          | 138.1              | 16  | 2.15 (m, 2.31 (m))         | 27.16 <sup>b</sup> | 24  | 2.20 (1H, m); 2.25 (1H, m) | 32.78              | 32  | 1.773 (3H, s)                                           | 16.14    |
|     |                            |                    |     |                            |                    |     |                            |                    | 33  | 1.679 (3H, s)                                           | 16.03    |

The carbon signals of **a** and **b** may be exchangeable between the same letters.

<sup>1</sup>H-NMR

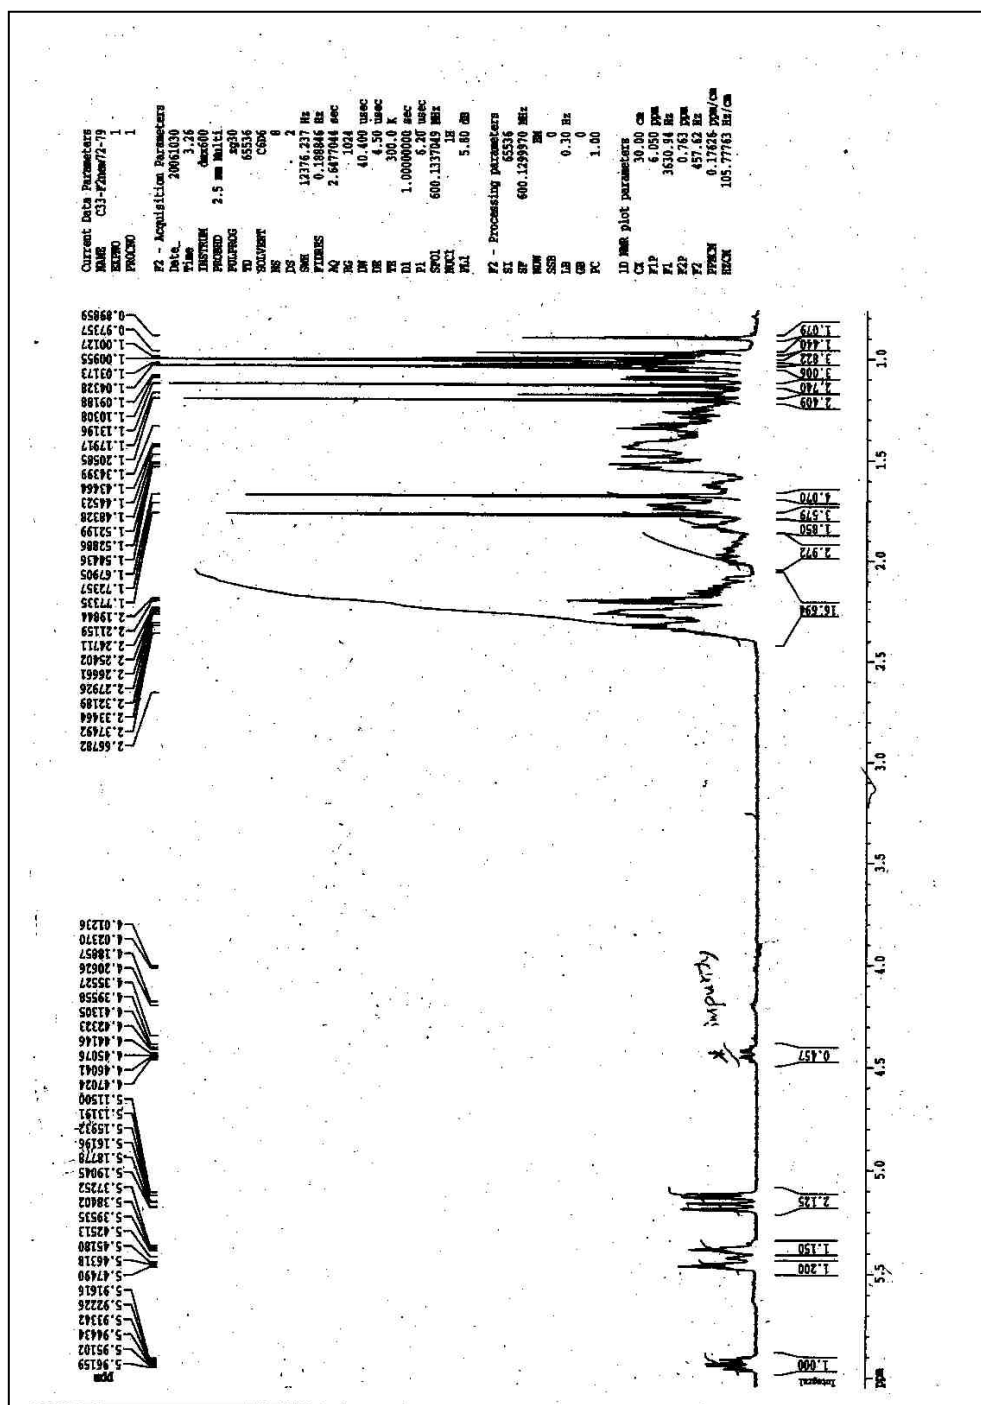



<sup>13</sup>C-NMR

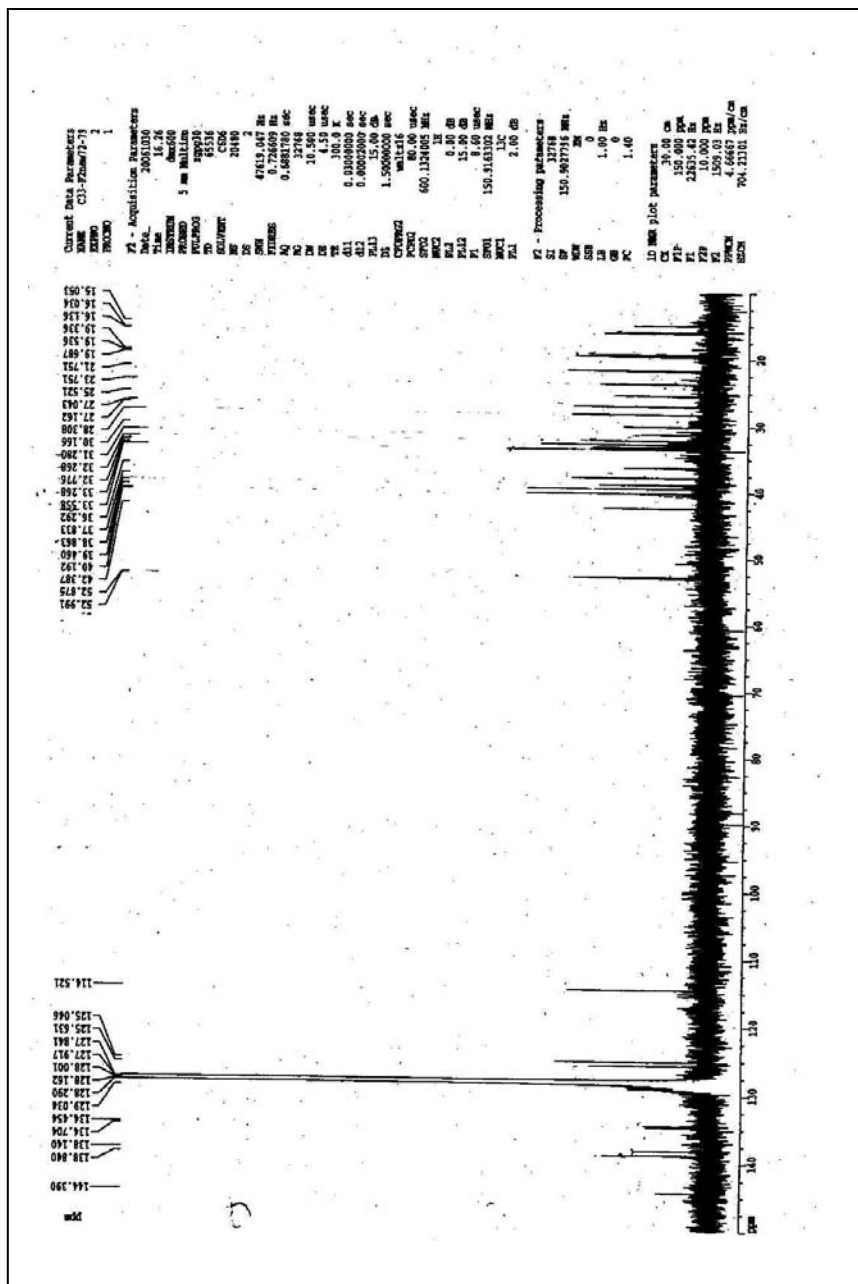

**Product 22**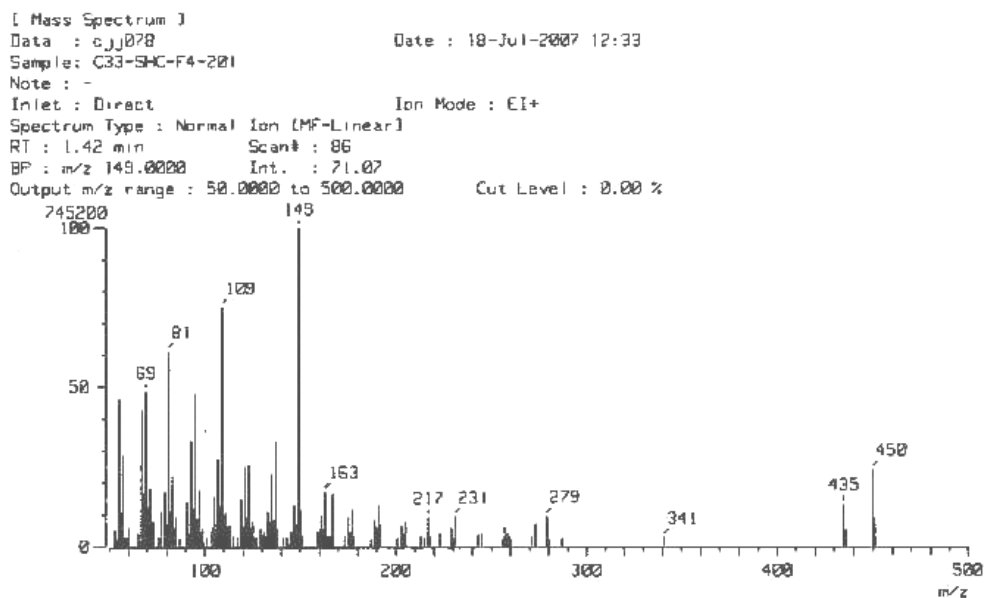**Product 22**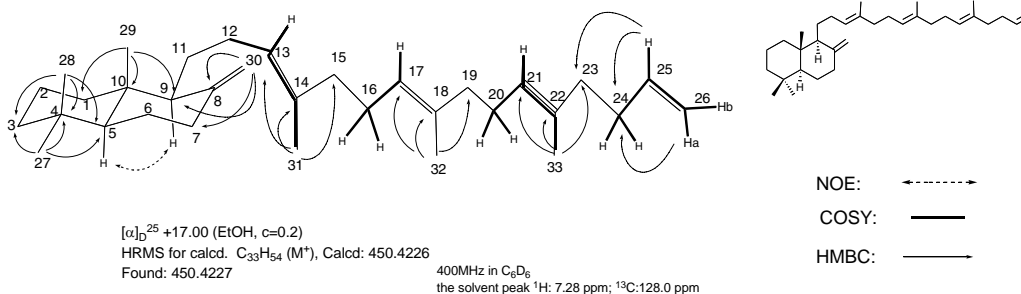

| NO. | <sup>1</sup> H             | <sup>13</sup> C | NO. | <sup>1</sup> H             | <sup>13</sup> C | NO. | <sup>1</sup> H       | <sup>13</sup> C | NO. | <sup>1</sup> H                                        | <sup>13</sup> C |
|-----|----------------------------|-----------------|-----|----------------------------|-----------------|-----|----------------------|-----------------|-----|-------------------------------------------------------|-----------------|
| 1   | 1.05 (1H, m); 1.79 (1H, m) | 39.29           | 9   | 1.76 (1H, m)               | 56.43           | 17  | 5.40 (1H, m)         | 124.9           | 25  | 5.90 (1H, m)                                          | 138.8           |
| 2   | 1.53 (1H, m); 1.60 (1H, m) | 19.77           | 10  | —                          | 39.82           | 18  | —                    | 134.9           | 26  | a:5.16(1H, dd, J=15.6, 1.6)<br>b:5.11(1H, bd, J=10.0) | 114.5           |
| 3   | 1.27 (1H, m); 1.47 (1H, m) | 42.43           | 11  | 1.63 (1H, m); 1.76 (1H, m) | 24.22           | 19  | 2.21 (2H, m)         | 40.21           | 27  | 0.939 (3H, s)                                         | 33.75           |
| 4   | —                          | 33.67           | 12  | 2.08 (1H, m); 2.40(1H, m)  | 27.37           | 20  | 2.31 (2H, m)         | 27.06           | 28  | 0.892(3H, s)                                          | 21.92           |
| 5   | 1.10 (1H, dd, J=12.8, 2.4) | 55.65           | 13  | 5.42 (1H, m)               | 125.7           | 21  | 5.33 (1H, t, J= 6.8) | 125.0           | 29  | 0.831(3H, s)                                          | 14.76           |
| 6   | 1.39 (1H, m); 1.72 (1H, m) | 24.77           | 14  | —                          | 134.9           | 22  | —                    | 134.4           | 30  | 5.06 (1H, s); 4.80(1H, s)                             | 106.7           |
| 7   | 2.18 (1H, m); 2.49(1H, m)  | 38.74           | 15  | 2.21 (2H, m)               | 40.26           | 23  | 2.17 (2H, m)         | 39.46           | 31  | 1.74 (3H, s)                                          | 16.04           |
| 8   | —                          | 148.8           | 16  | 2.31 (2H m)                | 27.14           | 24  | 2.23 (2H, m)         | 32.77           | 32  | 1.71 (3H, s)                                          | 16.14           |
|     |                            |                 |     |                            |                 |     |                      |                 | 33  | 1.64 (3H, s)                                          | 16.19           |

Positions of 15 and 19 are exchangeable; positions of 12, 16 and 20 are exchangeable; positions of 13, 21 and 17 are exchangeable; positions of 14, 18, 22 are exchangeable



<sup>13</sup>C-NMR

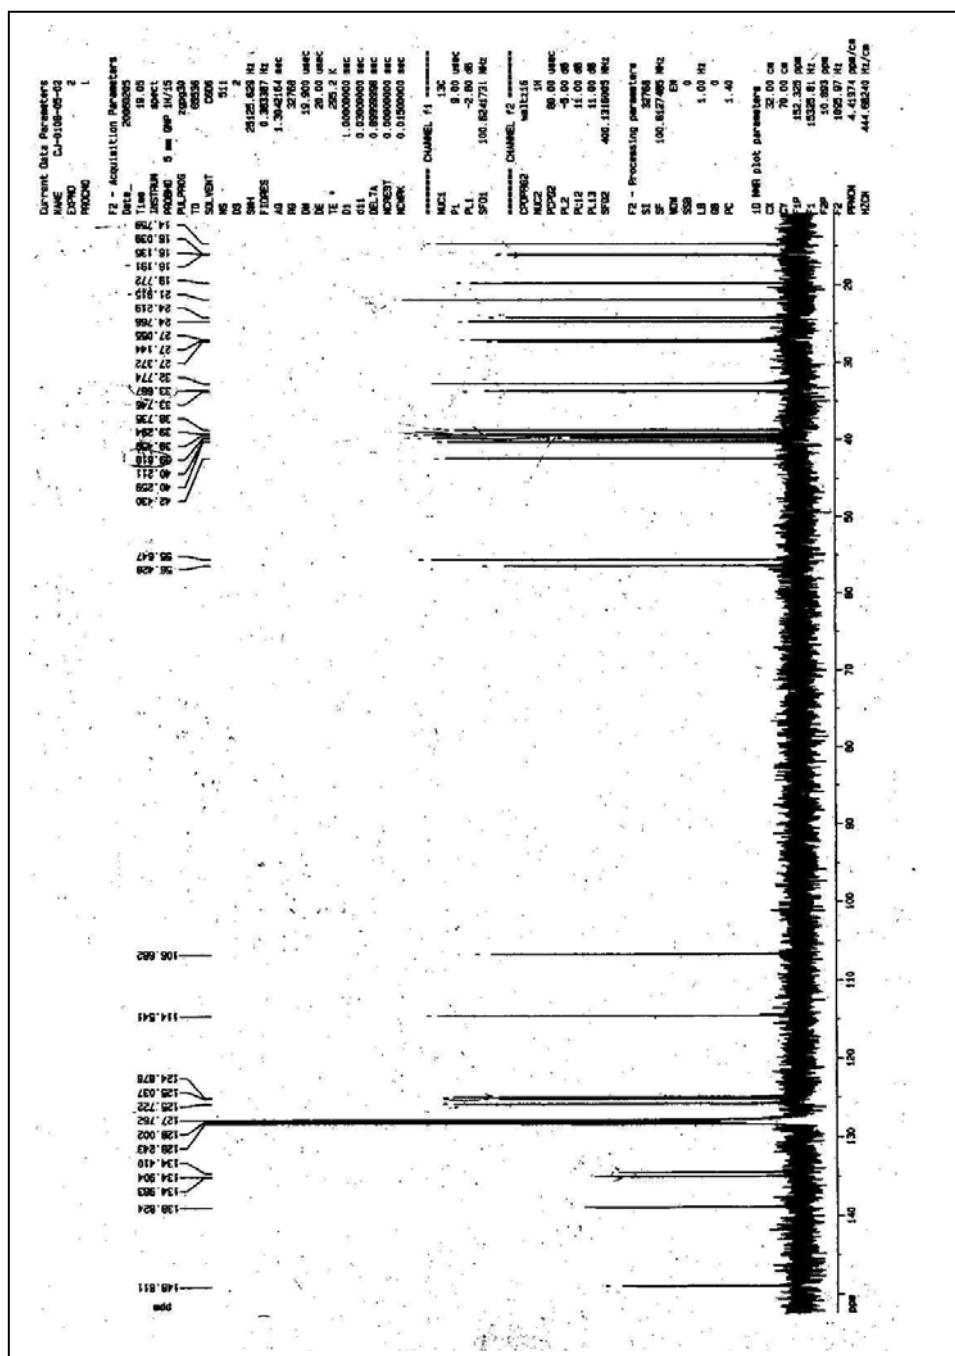

**Product 23**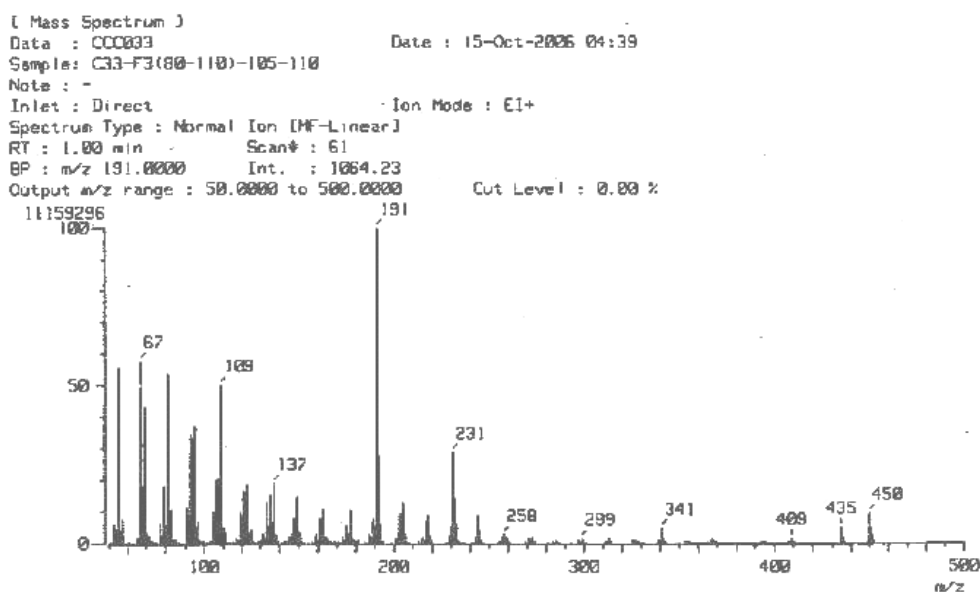**Product 23**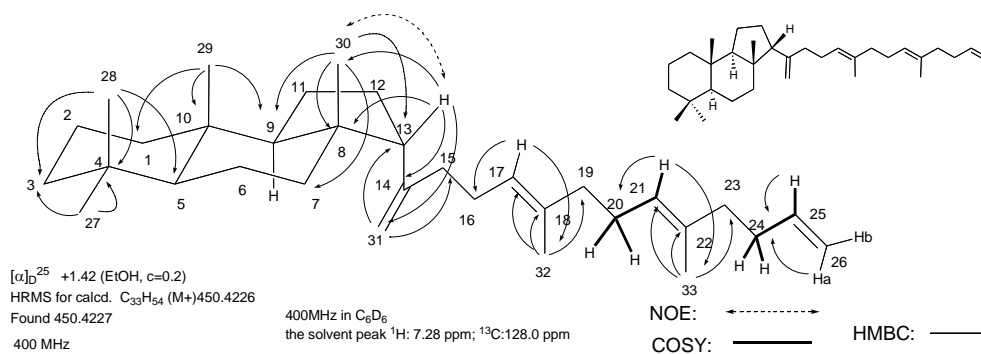

| NO. | <sup>1</sup> H                        | <sup>13</sup> C    | NO. | <sup>1</sup> H           | <sup>13</sup> C | NO. | <sup>1</sup> H       | <sup>13</sup> C | NO. | <sup>1</sup> H                               | <sup>13</sup> C |
|-----|---------------------------------------|--------------------|-----|--------------------------|-----------------|-----|----------------------|-----------------|-----|----------------------------------------------|-----------------|
| 1   | 1.08(1H, m); 1.59(1H, m)              | 40.74              | 9   | 1.65(1H, m)              | 55.84           | 17  | 5.42(1H, t, J=6.4Hz) | 125.0           | 25  | 5.93(1H, m)                                  | 138.8           |
| 2   | 1.49(1H, m); 1.76(1H, m) <sup>a</sup> | 18.83 <sup>b</sup> | 10  | —                        | 37.05           | 18  | —                    | 135.1           | 26  | a:5.16(1H, bd., 16.8);<br>b:5.11(bd.,10.4Hz) | 114.5           |
| 3   | 1.25(1H, m); 1.48(1H, m)              | 42.68              | 11  | 1.56(1H, m); 1.65(1H, m) | 21.06           | 19  | 2.20(2H, m)          | 40.13           | 27  | 0.945(3H, s)                                 | 33.62           |
| 4   | —                                     | 33.14              | 12  | 1.84(1H, m); 2.15(1H, m) | 28.17           | 20  | 2.27(2H, m)          | 27.00           | 28  | 0.969(3H, s)                                 | 21.63           |
| 5   | 0.92(1H, m)                           | 57.25              | 13  | 2.31(1H, m)              | 56.98           | 21  | 5.35(1H, t, 6.4Hz)   | 124.8           | 29  | 0.994(3H, s)                                 | 15.80           |
| 6   | 1.49(1H, m); 1.68(1H, m) <sup>a</sup> | 19.63 <sup>b</sup> | 14  | —                        | 154.6           | 22  | —                    | 134.5           | 30  | 1.101(3H, s)                                 | 25.01           |
| 7   | 1.44(1H, m); 1.70(1H, m)              | 37.10              | 15  | 2.20(1H, m); 2.34(1H, m) | 39.81           | 23  | 2.18(2H, m)          | 39.45           | 31  | 4.90(1H, s); 5.16(1H, s)                     | 109.3           |
| 8   | —                                     | 45.86              | 16  | 2.30(1H, m); 2.40(1H, m) | 27.38           | 24  | 2.27(2H, m)          | 32.77           | 32  | 1.721(3H, s)                                 | 16.12           |
|     |                                       |                    |     |                          |                 |     |                      |                 | 33  | 1.670(3H, s)                                 | 16.04           |

The assignments of proton and carbon signals at 2- and 6-position may be exchangeable.

<sup>1</sup>H-NMR

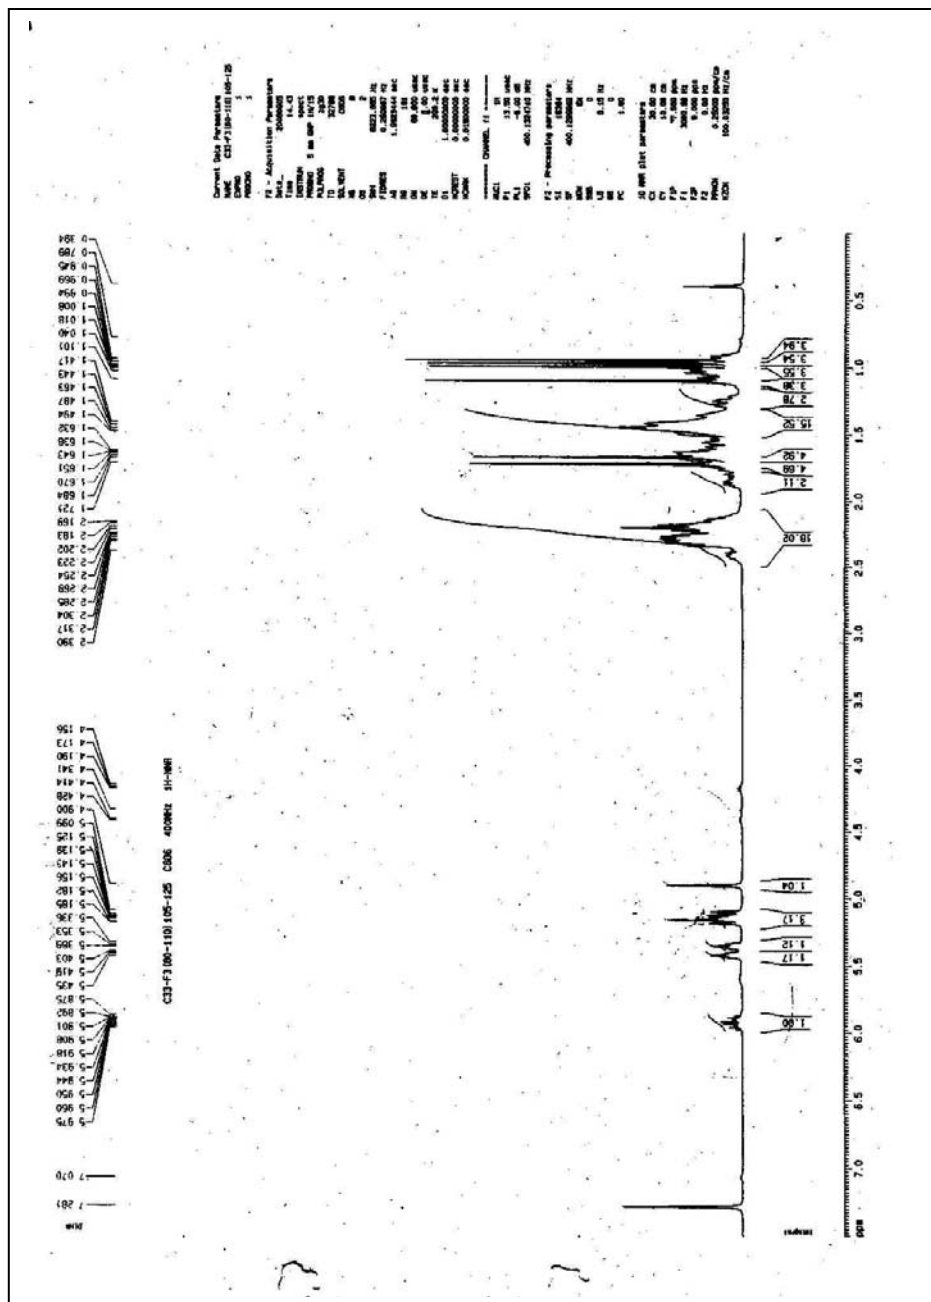



**Product 24**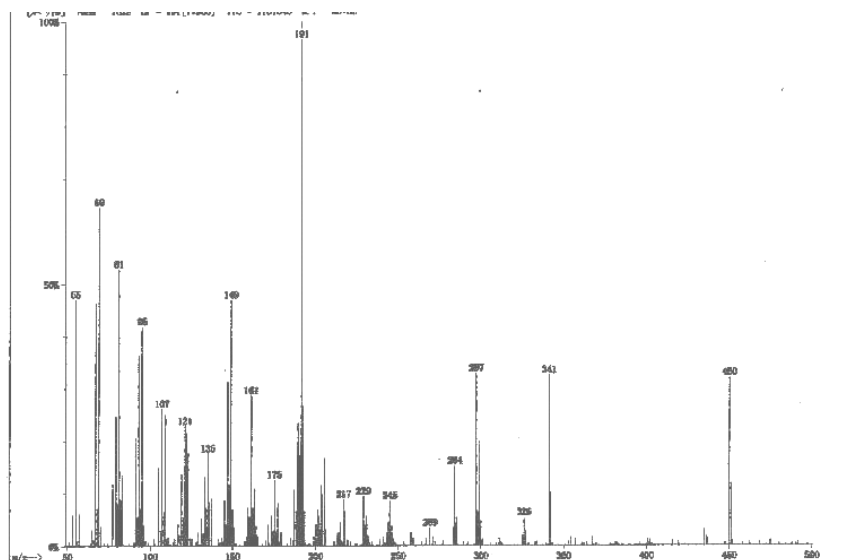**Product 24 (Oil)**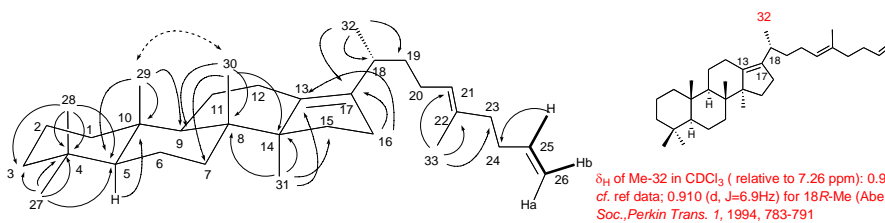

$[\alpha]_D^{25}$  -35.67 (EtOH,  $c=0.1$ )  
 HRMS for calcd.  $\text{C}_{33}\text{H}_{54}$  ( $M^+$ ) 450.4226  
 Found 450.4219

600 MHz in  $\text{C}_6\text{D}_6$   
 the solvent peak  $^1\text{H}$ : 7.28 ppm;  $^{13}\text{C}$ : 128.0 ppm

NOE:  $\dashleftarrow$   $\dashrightarrow$   
 COSY:  $\text{---}$  HMBC:  $\text{---}$

| NO. | $^1\text{H}$             | $^{13}\text{C}$ | NO. | $^1\text{H}$             | $^{13}\text{C}$ | NO. | $^1\text{H}$             | $^{13}\text{C}$ | NO. | $^1\text{H}$                                    | $^{13}\text{C}$ |
|-----|--------------------------|-----------------|-----|--------------------------|-----------------|-----|--------------------------|-----------------|-----|-------------------------------------------------|-----------------|
| 1   | 0.95(1H, m); 1.79(1H, m) | 40.96           | 9   | 1.60(1H, bd, 12.2Hz)     | 52.25           | 17  | —                        | 135.1           | 25  | 5.97(1H, m)                                     | 137.6           |
| 2   | 1.45(1H, m); 1.70(1H, m) | 18.99           | 10  | —                        | 38.10           | 18  | 2.67(1H, m)              | 32.27           | 26  | a:5.23(1H, bd, 17.1Hz)<br>b:5.14(1H, bd, 9.7Hz) | 114.3           |
| 3   | 1.27(1H, m); 1.50(1H, m) | 42.41           | 11  | 1.43(m); 1.70(m)         | 22.19           | 19  | 1.50(1H, m); 1.82(1H, m) | 35.43           | 27  | 1.03(3H, s)                                     | 33.68           |
| 4   | —                        | 33.53           | 12  | 2.05(1H, m); 2.62(1H, m) | 23.41           | 20  | 2.18(m); 2.33(m)         | 32.63           | 28  | 0.972(3H, s)                                    | 21.91           |
| 5   | 0.94(1H, m)              | 57.38           | 13  | —                        | 139.6           | 21  | 5.44(1H, bt, 7.1)        | 125.8           | 29  | 1.017(3H, s)                                    | 16.67           |
| 6   | 1.46(1H, m); 1.67(1H, m) | 19.08           | 14  | —                        | 57.00           | 22  | —                        | 134.2           | 30  | 1.105(3H, s)                                    | 17.67           |
| 7   | 1.50(1H, m); 1.67(1H, m) | 35.85           | 15  | 2.11 (2H, m)             | 31.09           | 23  | 2.23(2H, m)              | 39.52           | 31  | 1.310(3H, s)                                    | 23.13           |
| 8   | —                        | 41.67           | 16  | 2.30(1H, m); 2.48(1H, m) | 29.49           | 24  | 2.27(2H, m)              | 32.77           | 32  | 1.144(3H, d, 6.7Hz)                             | 20.21           |
|     |                          |                 |     |                          |                 |     |                          |                 | 33  | 1.714(3H, s)                                    | 16.03           |

The proton and carbon signals at C2 and C6 may be exchangeable.



<sup>1</sup>H-NMR

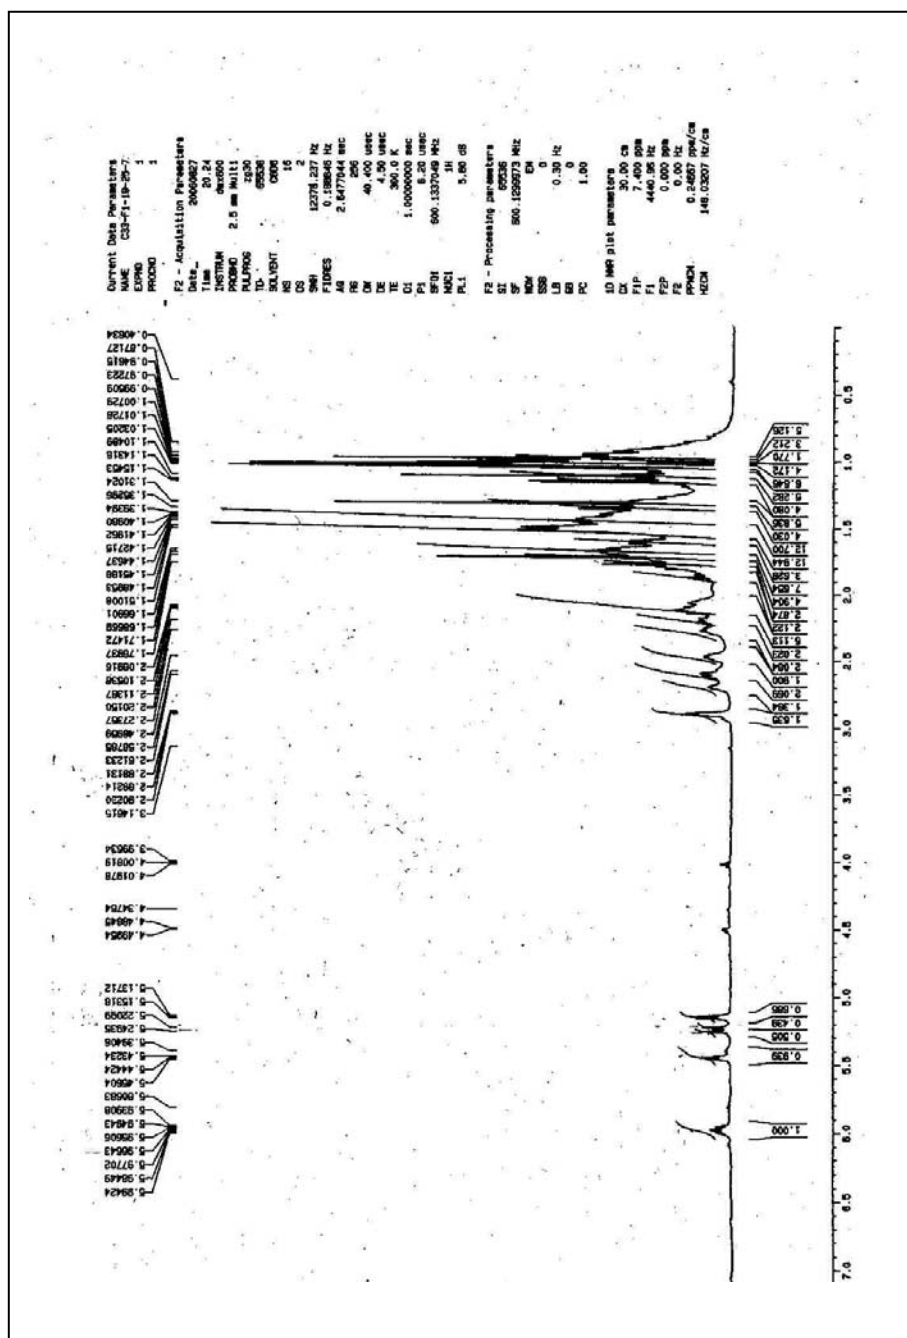



**Product 25**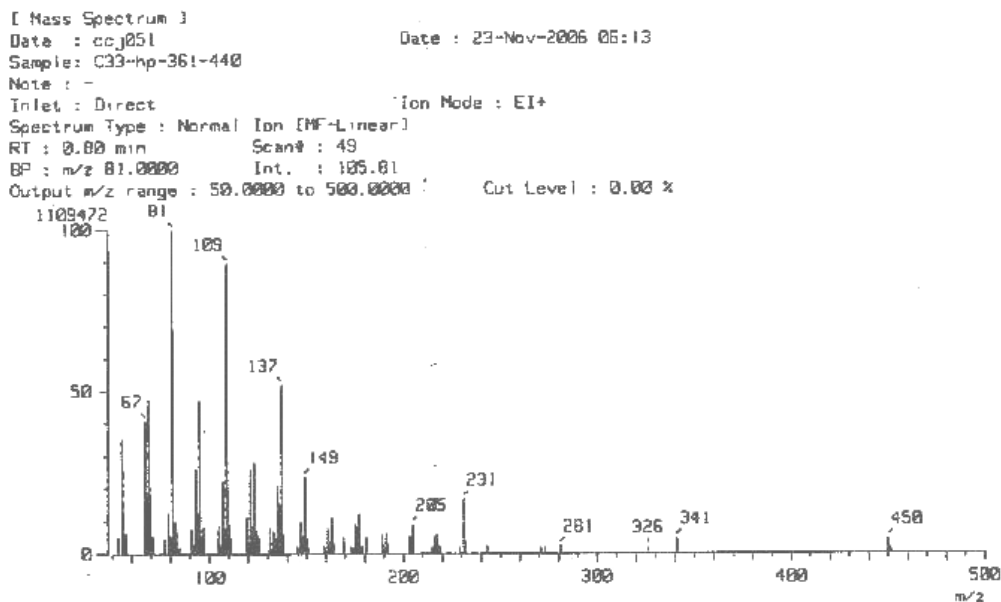**Product 25**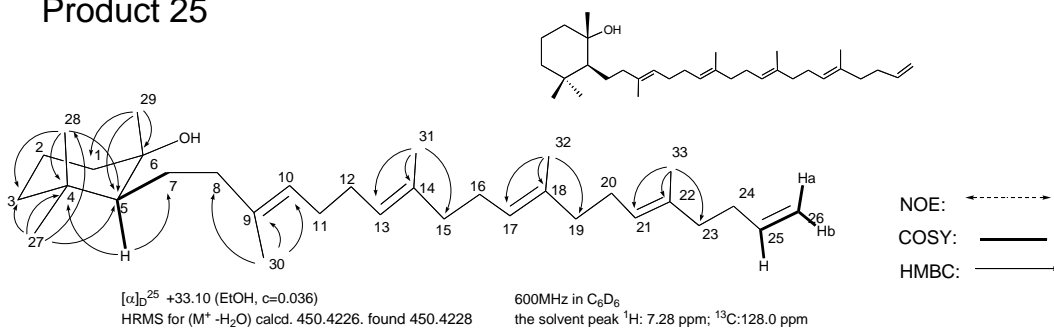

| NO. | $^1H$                                         | $^{13}C$ | NO. | $^1H$       | $^{13}C$ | NO. | $^1H$                 | $^{13}C$ | NO. | $^1H$                                              | $^{13}C$ |
|-----|-----------------------------------------------|----------|-----|-------------|----------|-----|-----------------------|----------|-----|----------------------------------------------------|----------|
| 1   | 1.23(1H, ddd, 12.5, 12.5, 3.8Hz); 1.72(1H, m) | 43.97    | 9   | —           | 136.6    | 17  | 5.42(1H, t, 6.4)      | 124.9    | 25  | 5.93(1H, m)                                        | 138.8    |
| 2   | 1.41(1H, m); 1.49(1H, m)                      | 20.85    | 10  | 5.54(1H, m) | 124.6    | 18  | —                     | 134.9    | 26  | Ha:5.16(1H, bd, 16.6)<br>Hb:5.12(1H, bd, $J=9.3$ ) | 114.5    |
| 3   | 1.22(1H, m); 1.35(1H, m)                      | 41.77    | 11  | 2.30(2H, m) | 28.79    | 19  | 2.22(2H, m)           | 40.25    | 27  | 1.056(3H, s)                                       | 32.95    |
| 4   | —                                             | 35.60    | 12  | 2.30(2H, m) | 28.76    | 20  | 2.32(2H, m)           | 27.04    | 28  | 0.872(3H, s)                                       | 21.58    |
| 5   | 1.15(1H, m)                                   | 56.86    | 13  | 5.47(1H, m) | 124.9    | 21  | 5.37(1H, t, $J=6.6$ ) | 125.1    | 29  | 1.203(3H, s)                                       | 23.50    |
| 6   | —                                             | 73.51    | 14  | —           | 135.2    | 22  | —                     | 134.4    | 30  | 1.843(3H, s)                                       | 16.35    |
| 7   | 1.57 (m); 1.86(m)                             | 25.35    | 15  | 2.22(2H, m) | 40.16    | 23  | 2.23(2H, m)           | 39.45    | 31  | 1.764(3H, s)                                       | 16.21    |
| 8   | 2.33(m); 2.47(m)                              | 43.41    | 16  | 2.34(2H, m) | 27.14    | 24  | 2.26(2H, m)           | 32.76    | 32  | 1.734(3H, s)                                       | 16.11    |
|     |                                               |          |     |             |          |     |                       |          | 33  | 1.673(3H, s)                                       | 16.02    |

The following positions may be exchangeable between 11 and 12, between 14 and 18, between 15 and 19, between 16 and 20, and between 31 and 32





**Product 26**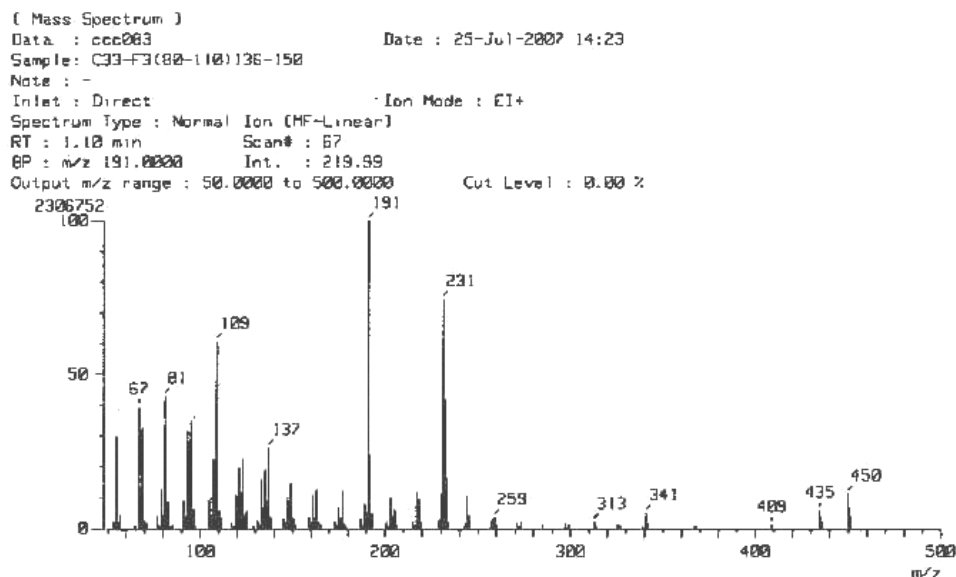**Product 26**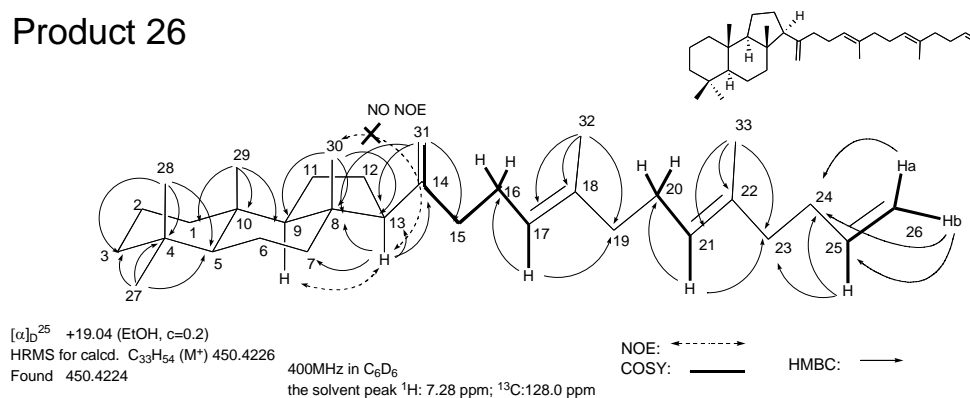

| NO. | <sup>1</sup> H           | <sup>13</sup> C    | NO. | <sup>1</sup> H           | <sup>13</sup> C | NO. | <sup>1</sup> H     | <sup>13</sup> C    | NO. | <sup>1</sup> H                                       | <sup>13</sup> C |
|-----|--------------------------|--------------------|-----|--------------------------|-----------------|-----|--------------------|--------------------|-----|------------------------------------------------------|-----------------|
| 1   | 0.94(1H, m); 1.52(1H, m) | 40.15 <sup>a</sup> | 9   | 1.28(1H, m)              | 63.36           | 17  | 5.46(1H, t, 6.4Hz) | 124.9              | 25  | 5.93(1H, m)                                          | 138.8           |
| 2   | 1.49(1H, m); 1.74(1H, m) | 18.77              | 10  | —                        | 37.39           | 18  | —                  | 135.0              | 26  | Ha:5.18(1H, bdd, 16.8, 1.6Hz)<br>Hb:5.12(bd, 10.0Hz) | 114.5           |
| 3   | 1.28(1H, m); 1.52(1H, m) | 42.90              | 11  | 1.45(1H, m); 1.60(1H, m) | 19.81           | 19  | 2.22 (2H, m)       | 40.26 <sup>a</sup> | 27  | 1.020(3H, s)                                         | 33.74           |
| 4   | —                        | 33.17              | 12  | 1.82(1H, m); 1.95(1H, m) | 25.80           | 20  | 2.30(2H, m)        | 26.99              | 28  | 0.975(3H, s)                                         | 21.50           |
| 5   | 0.88(1H, m)              | 57.57              | 13  | 2.20(1H, m)              | 57.57           | 21  | 5.36(1H, t, 6.0Hz) | 124.9              | 29  | 0.962 (3H, s)                                        | 15.62           |
| 6   | 1.28(1H, m); 1.40(1H, m) | 19.81              | 14  | —                        | 149.2           | 22  | —                  | 134.5              | 30  | 0.847(3H, s)                                         | 15.38           |
| 7   | 1.27(1H, m); 1.92(1H, m) | 41.47              | 15  | 2.25(1H, m); 2.32(1H, m) | 38.12           | 23  | 2.19(2H, m)        | 39.45              | 31  | 5.03(1H, s); 5.21(1H, s)                             | 110.6           |
| 8   | —                        | 43.99              | 16  | 2.41(2H, m)              | 27.53           | 24  | 2.26(2H, m)        | 32.78              | 32  | 1.756(3H, s)                                         | 16.17           |
|     |                          |                    |     |                          |                 |     |                    |                    | 33  | 1.667(3H, s)                                         | 16.05           |

The carbon signals of **a** may be exchangeable.

<sup>1</sup>H-NMR

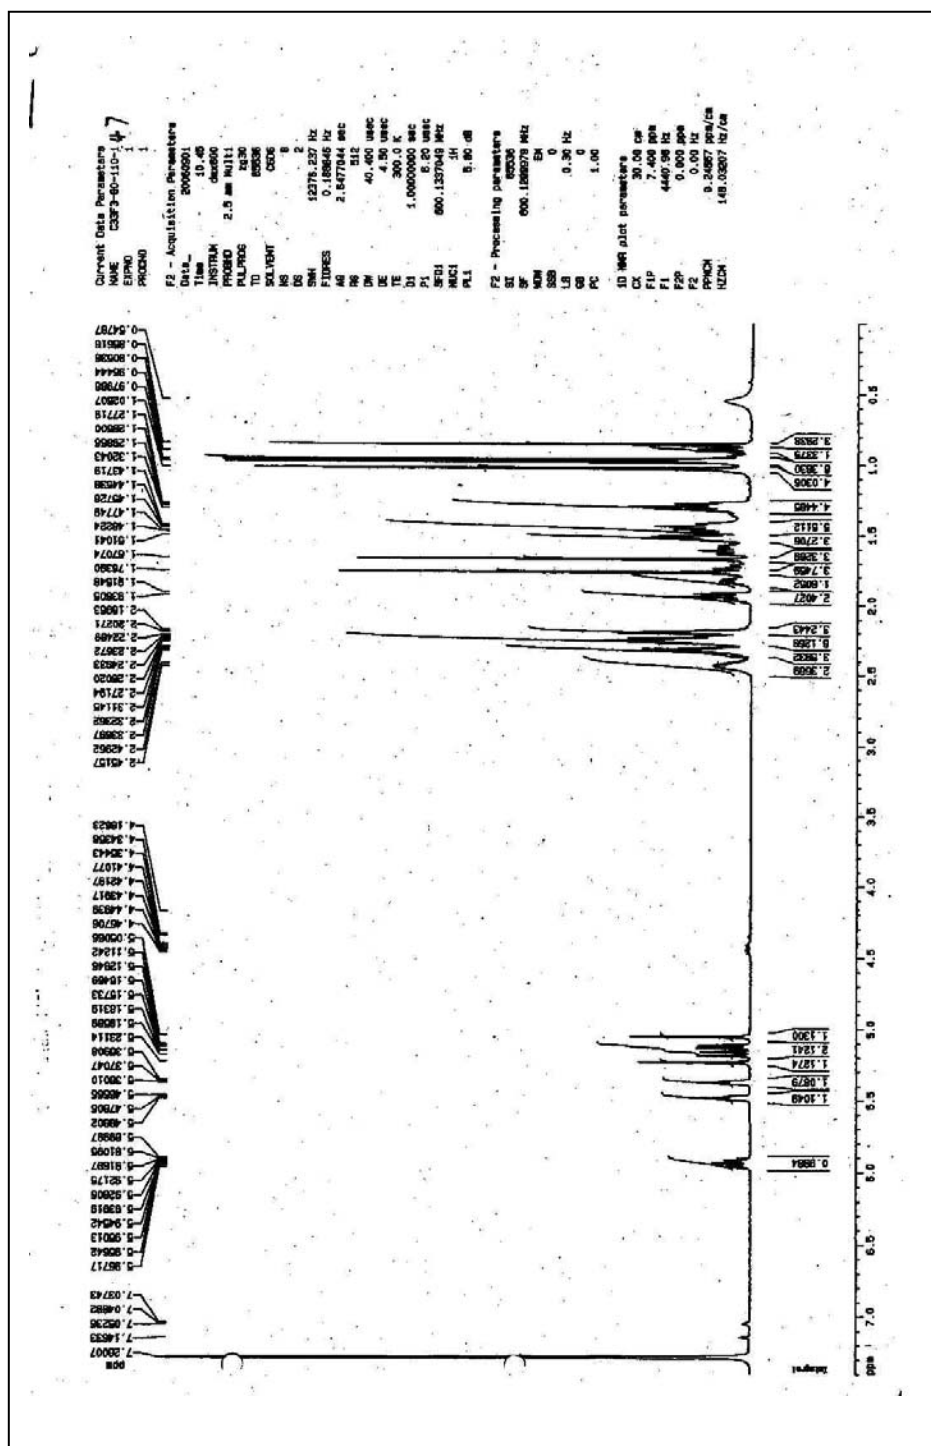





**Product 27**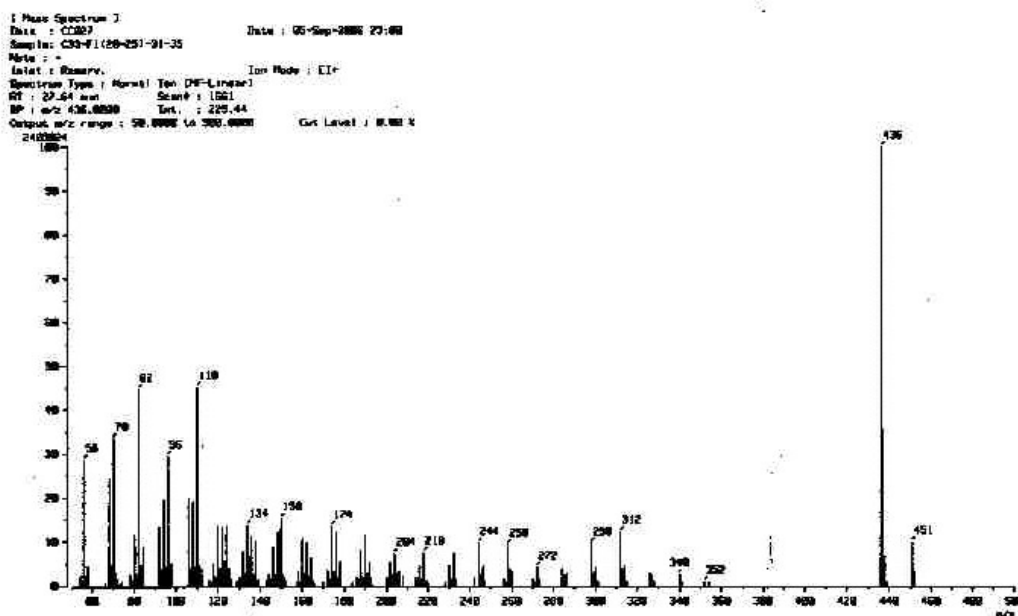**Product 27 (oil)**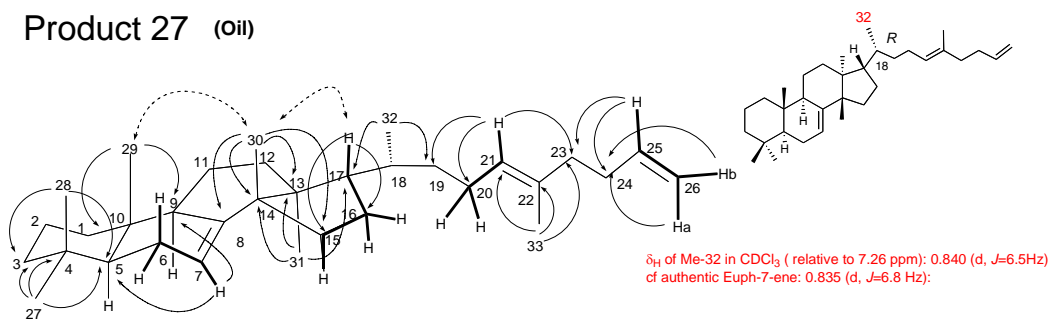

$[\alpha]_{\text{D}}^{25}$  -19.80 (EtOH,  $c=0.1$ )  
 HRMS for calcd.  $\text{C}_{33}\text{H}_{54}$  ( $M^+$ ) 450.4226  
 Found 450.4231

600 MHz in  $\text{C}_6\text{D}_6$   
 the solvent peak  $^1\text{H}$ : 7.28 ppm;  $^{13}\text{C}$ :128.0 ppm

NOE:  $\dashrightarrow$   
 COSY:  $\text{—}$  HMBC:  $\text{—}$

| NO. | $^1\text{H}$    | $^{13}\text{C}$ | NO. | $^1\text{H}$    | $^{13}\text{C}$ | NO. | $^1\text{H}$        | $^{13}\text{C}$ | NO. | $^1\text{H}$         | $^{13}\text{C}$ |
|-----|-----------------|-----------------|-----|-----------------|-----------------|-----|---------------------|-----------------|-----|----------------------|-----------------|
| 1   | 1.06(m);1.75(m) | 39.36           | 9   | 2.43(m)         | 49.56           | 17  | 1.64(m)             | 53.73           | 25  | 5.93(1H, m)          | 138.8           |
| 2   | 1.65(2H,m)      | 18.55           | 10  | —               | 35.46           | 18  | 1.58(m)             | 36.09           | 26  | 5.17(1H, bd, 17.1Hz) | 114.5           |
| 3   | 1.28(m);1.55(m) | 42.77           | 11  | 1.50(m);1.66(m) | 19.47           | 19  | 1.52(m);1.89(m)     | 35.65           | 27  | 5.11(1H, bd, 9.2Hz)  | 33.16           |
| 4   | —               | 33.32           | 12  | 1.78(m);1.95(m) | 34.44           | 20  | 2.18(m);2.33(m)     | 25.68           | 28  | 1.031(3H,s)          | 21.51           |
| 5   | 1.48 (1H, m)    | 51.76           | 13  | —               | 43.95           | 21  | 5.44(1H, bt, 6.9Hz) | 125.8           | 29  | 0.955(3H,s)          | 13.36           |
| 6   | 1.98(m);2.25(m) | 24.76           | 14  | —               | 51.76           | 22  | —                   | 134.2           | 30  | 1.183(3H,s)          | 27.62           |
| 7   | 5.48(bs)        | 118.5           | 15  | 1.62(m);1.76(m) | 34.44           | 23  | 2.23 (2H,m)         | 39.54           | 31  | 1.072(3H,s)          | 22.48           |
| 8   | —               | 146.1           | 16  | 1.38(m);2.04(m) | 28.80           | 24  | 2.26(2H,m)          | 32.79           | 32  | 1.055(3H,d, 6.5Hz)   | 18.82           |
|     |                 |                 |     |                 |                 |     |                     |                 | 33  | 1.735(3H, s)         | 16.06           |



<sup>13</sup>C-NMR

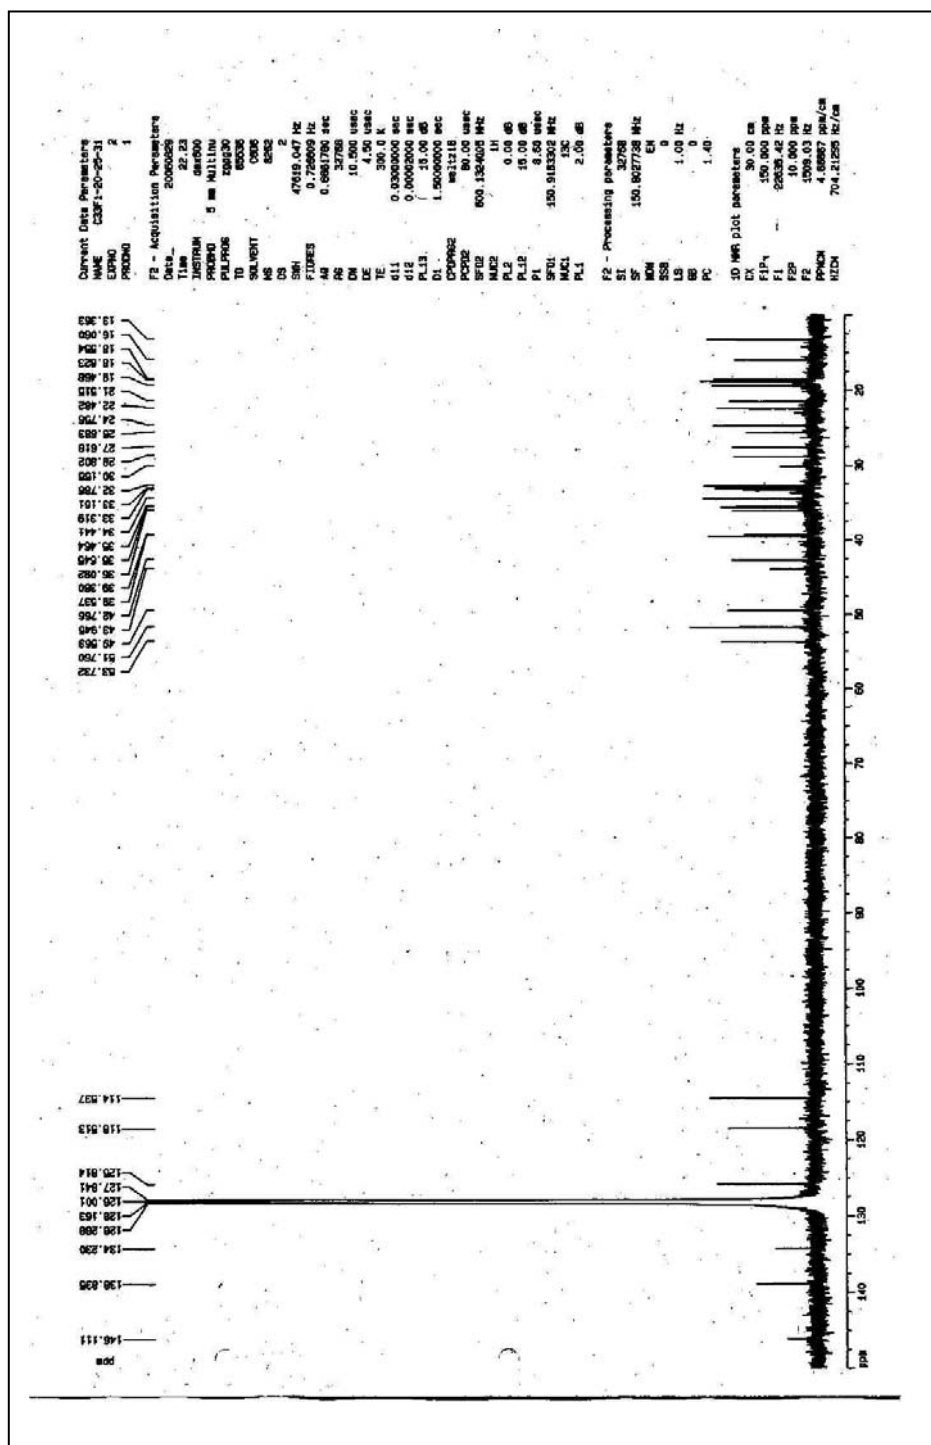

**Product 28**

[ Mass Spectrum ]  
 Data : CCG035 Date : 15-Oct-2006 04:49  
 Sample: C33-F2-HPLC-1  
 Note : -  
 Inlet : Direct Ion Mode : EI+  
 Spectrum Type : Normal Ion [MF-Linear]  
 RT : 0.90 min Scan# : 55  
 BP : m/z 191.0000 Int. : 724.70  
 Output m/z range : 50.0000 to 500.0000 Cut Level : 0.00 %

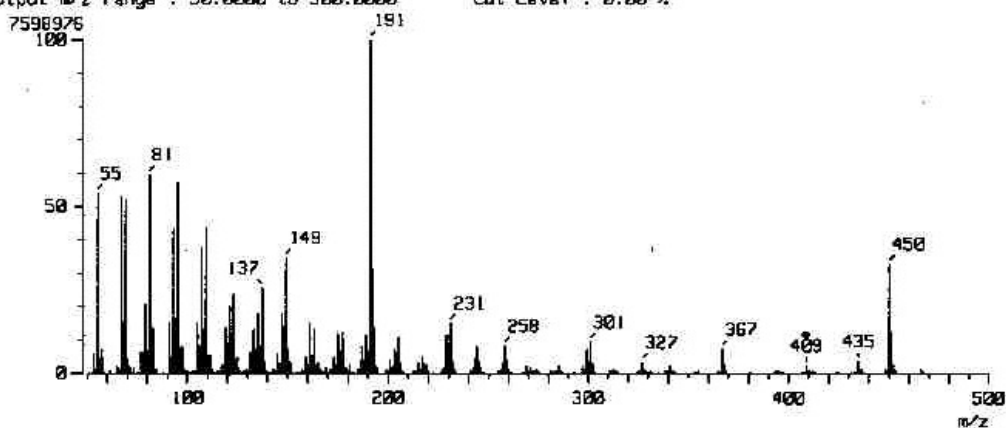**Product 28**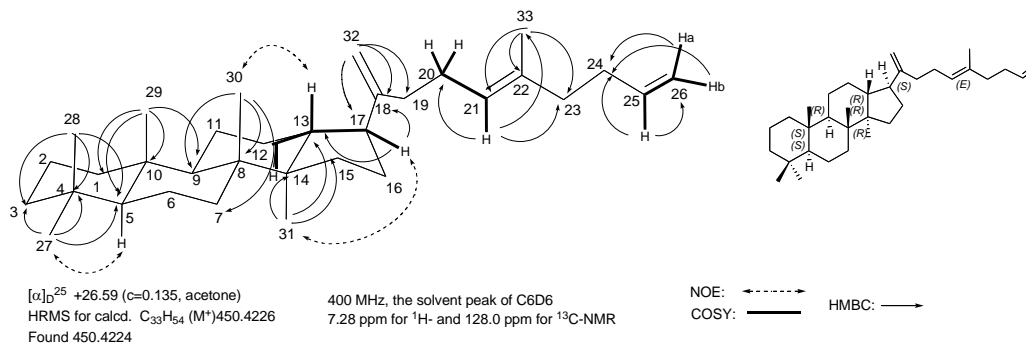

| NO. | $^1H$                                          | $^{13}C$           | NO. | $^1H$                    | $^{13}C$ | NO. | $^1H$            | $^{13}C$ | NO. | $^1H$                                                  | $^{13}C$ |
|-----|------------------------------------------------|--------------------|-----|--------------------------|----------|-----|------------------|----------|-----|--------------------------------------------------------|----------|
| 1   | 1.72(1H, m); 0.872(1H, ddd, 12.0, 12.0, 4.1Hz) | 40.92              | 9   | 1.47(1H, m)              | 51.43    | 17  | 2.41(1H, m)      | 48.28    | 25  | 5.93 (1H, m)                                           | 138.8    |
| 2   | 1.50(1H, m); 1.63(1H, m)                       | 18.98 <sup>a</sup> | 10  | —                        | 37.77    | 18  | —                | 152.5    | 26  | a: 5.17(1H, bdd, 17.2, 1.6Hz)<br>b: 5.12(1H, bd, 11.6) | 114.6    |
| 3   | 1.27(1H, m); 1.50(1H, m)                       | 42.42              | 11  | 1.28(1H, m); 1.65(1H, m) | 21.61    | 19  | 2.25(2H, m)      | 34.75    | 27  | 1.030(3H, s)                                           | 33.65    |
| 4   | —                                              | 33.53              | 12  | 1.30(1H, m); 1.90(1H, m) | 25.49    | 20  | 2.38(2H, m)      | 27.39    | 28  | 0.984(3H, s)                                           | 21.79    |
| 5   | 0.911(1H, dd, 2.0, 12.0Hz)                     | 57.31              | 13  | 1.91(1H, m)              | 45.69    | 21  | 5.41(1H, t, 6.4) | 125.1    | 29  | 1.014(3H, s)                                           | 16.43    |
| 6   | 1.50(1H, m); 1.63(1H, m)                       | 19.08 <sup>a</sup> | 14  | —                        | 49.78    | 22  | —                | 134.6    | 30  | 1.109(3H, s)                                           | 16.09    |
| 7   | 1.37(1H, m); 1.72(1H, m)                       | 35.78              | 15  | 1.24(1H, m); 1.76(1H, m) | 31.72    | 23  | 2.18(2H, m)      | 39.44    | 31  | 0.971(3H, s)                                           | 16.19    |
| 8   | —                                              | 40.97              | 16  | 1.63(1H, m); 2.08(1H, m) | 29.40    | 24  | 2.22(2H, m)      | 32.74    | 32  | 5.10 (1H, s); 5.05 (1H, s)                             | 108.2    |

a: The carbon signals at the positions of 2 and 6 may be exchangeable



<sup>13</sup>C-NMR

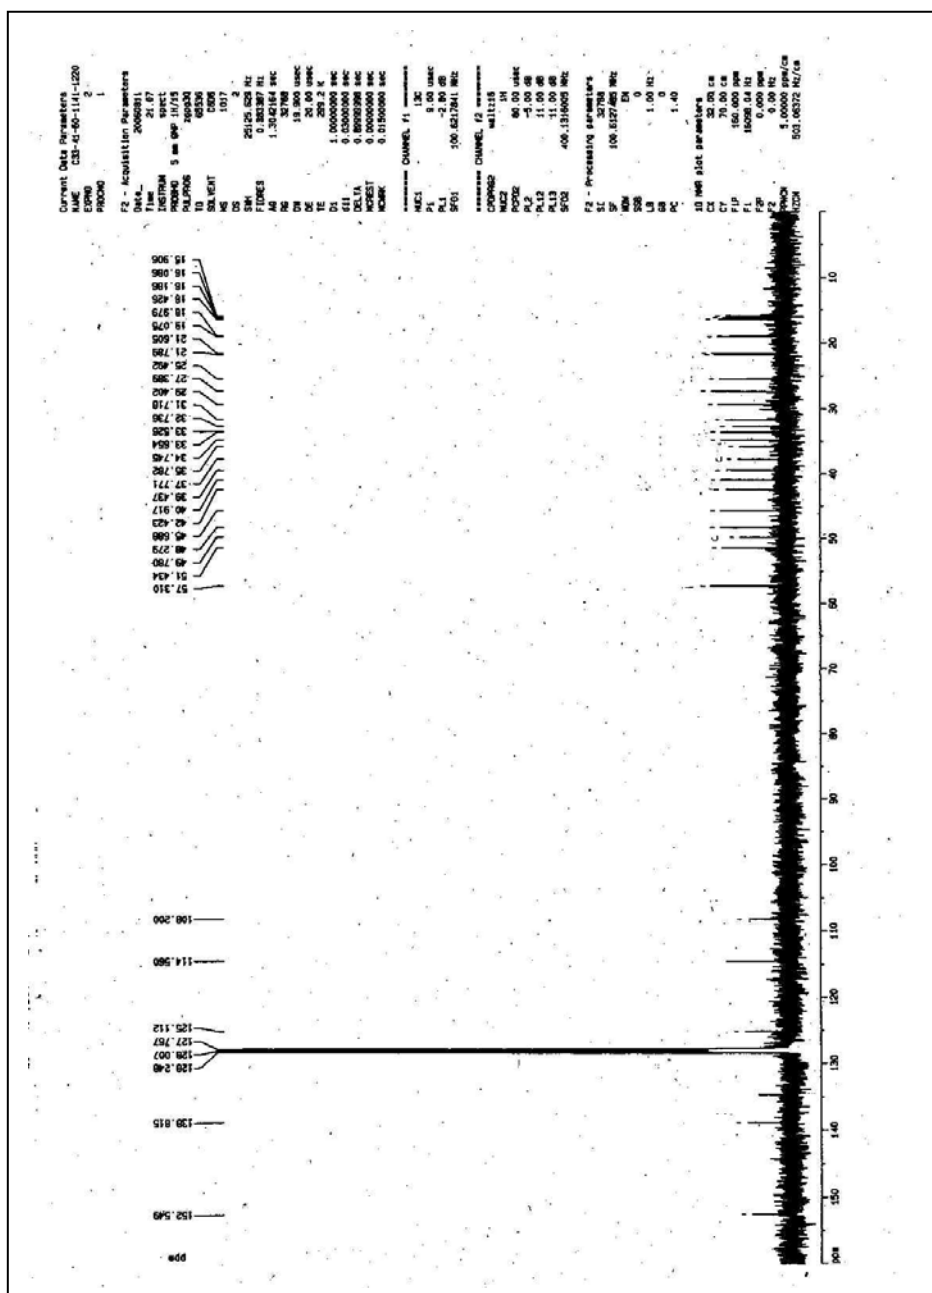

**Product 29**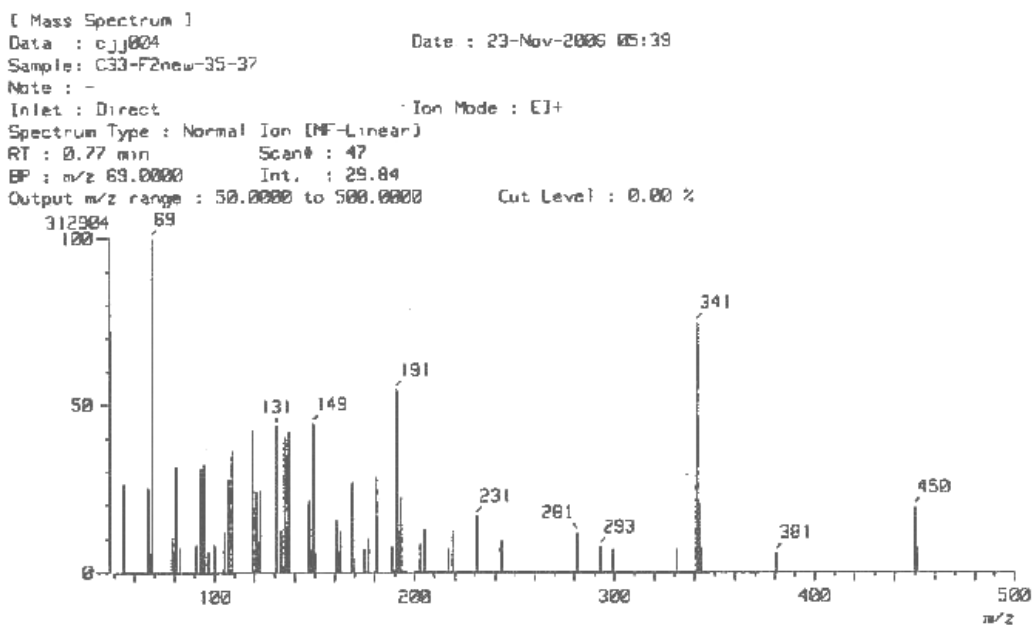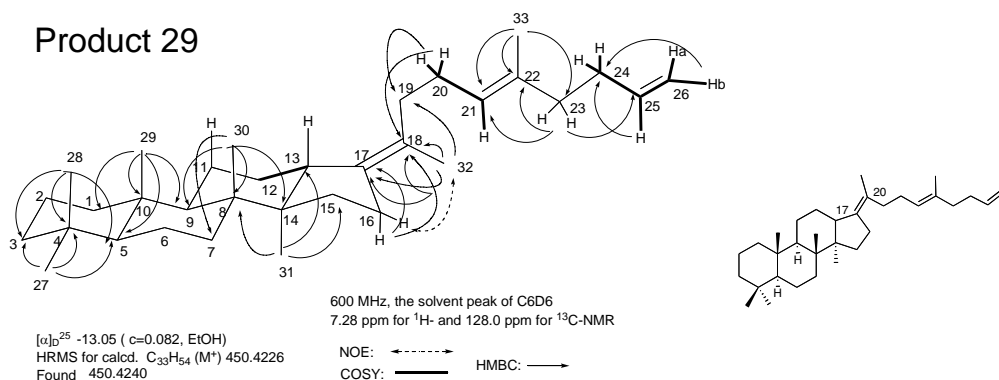

| NO. | <sup>1</sup> H           | <sup>13</sup> C    | NO. | <sup>1</sup> H           | <sup>13</sup> C | NO. | <sup>1</sup> H           | <sup>13</sup> C | NO. | <sup>1</sup> H                                   | <sup>13</sup> C |
|-----|--------------------------|--------------------|-----|--------------------------|-----------------|-----|--------------------------|-----------------|-----|--------------------------------------------------|-----------------|
| 1   | 0.88(1H, m); 1.75(1H, m) | 40.87              | 9   | 1.49(1H, m)              | 51.08           | 17  | —                        | 137.1           | 25  | 5.94(1H, m)                                      | 138.8           |
| 2   | 1.47(1H, m); 1.63(1H, m) | 18.93 <sup>a</sup> | 10  | —                        | 37.62           | 18  | —                        | 126.7           | 26  | a: 5.18(1H, bd, 17.1)<br>b: 5.12(1H, bd, 10.0Hz) | 114.5           |
| 3   | 1.27(1H, m); 1.47(1H, m) | 42.44              | 11  | 1.28(1H, m); 1.68(1H, m) | 21.78           | 19  | 2.41(2H, m)              | 34.13           | 27  | 1.029(3H, s)                                     | 33.59           |
| 4   | —                        | 33.51              | 12  | 1.65(1H, m); 2.48(1H, m) | 25.49           | 20  | 2.30(1H, m), 2.38(1H, m) | 28.39           | 28  | 0.984(3H, s)                                     | 21.74           |
| 5   | 0.91(1H, bd, 11.8Hz)     | 57.33              | 13  | 2.50(1H, m)              | 47.27           | 21  | 5.45(1H, m)              | 125.3           | 29  | 0.991(3H, s)                                     | 16.58           |
| 6   | 1.47(1H, m); 1.63(1H, m) | 19.05 <sup>a</sup> | 14  | —                        | 50.25           | 22  | —                        | 134.3           | 30  | 1.102(3H, s)                                     | 15.92           |
| 7   | 1.43(1H, m); 1.63(1H, m) | 35.89              | 15  | 1.25(1H, m); 1.65(1H, m) | 30.53           | 23  | 2.21(2H, m)              | 39.53           | 31  | 1.021(3H, s)                                     | 16.90           |
| 8   | —                        | 40.36              | 16  | 2.25(1H, m); 2.36(1H, m) | 30.05           | 24  | 2.21(1H, m); 2.29(1H, m) | 32.77           | 32  | 1.826(3H, bs)                                    | 21.08           |
|     |                          |                    |     |                          |                 |     |                          |                 | 33  | 1.736(3H, s)                                     | 16.08           |

a: the assignments of C2 and C6 may be exchangeable.









HOHAHA

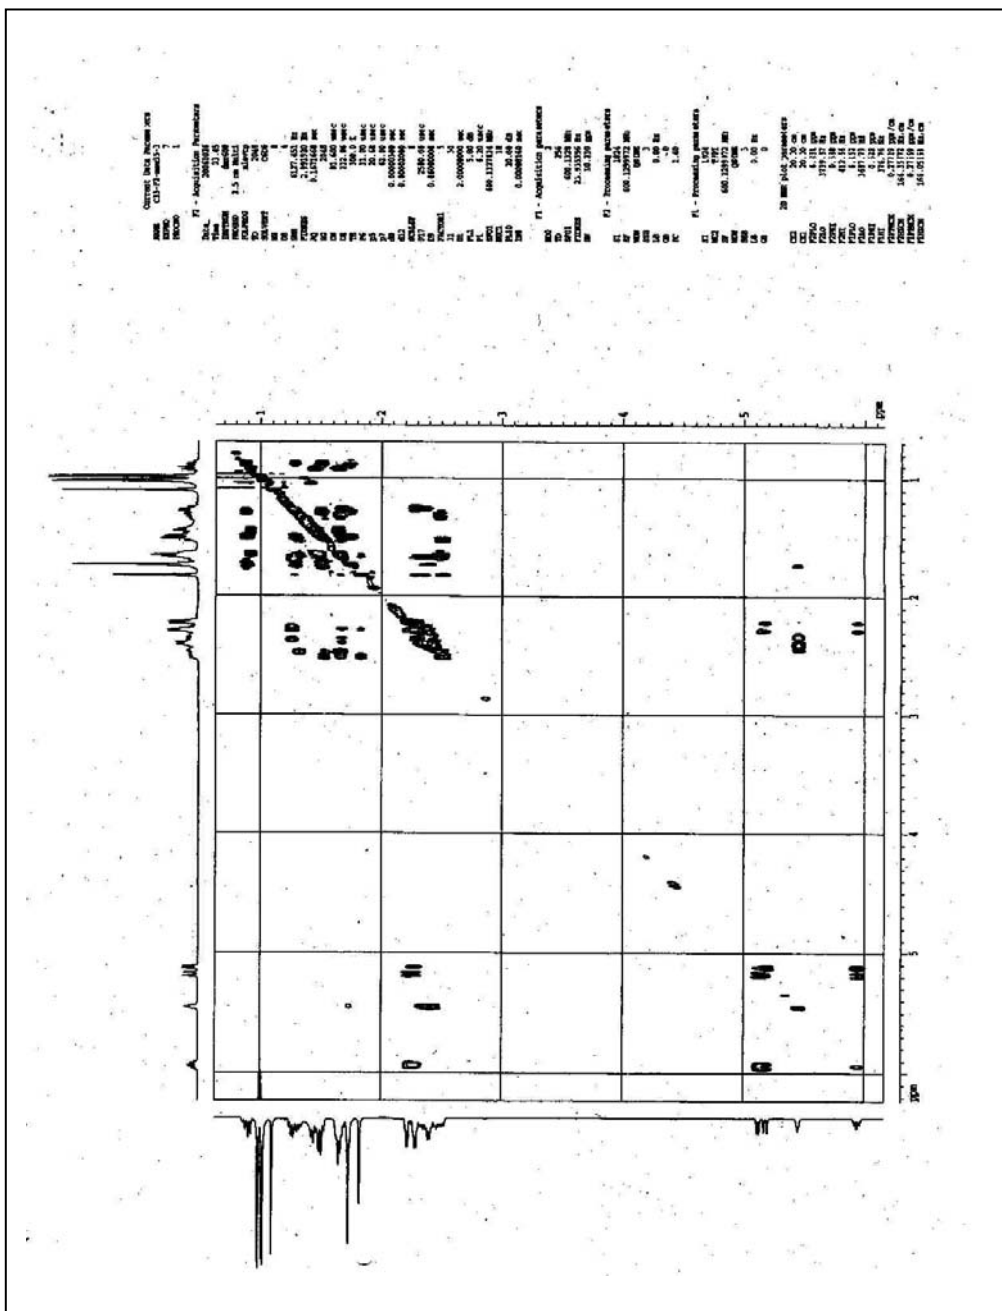





HMBC

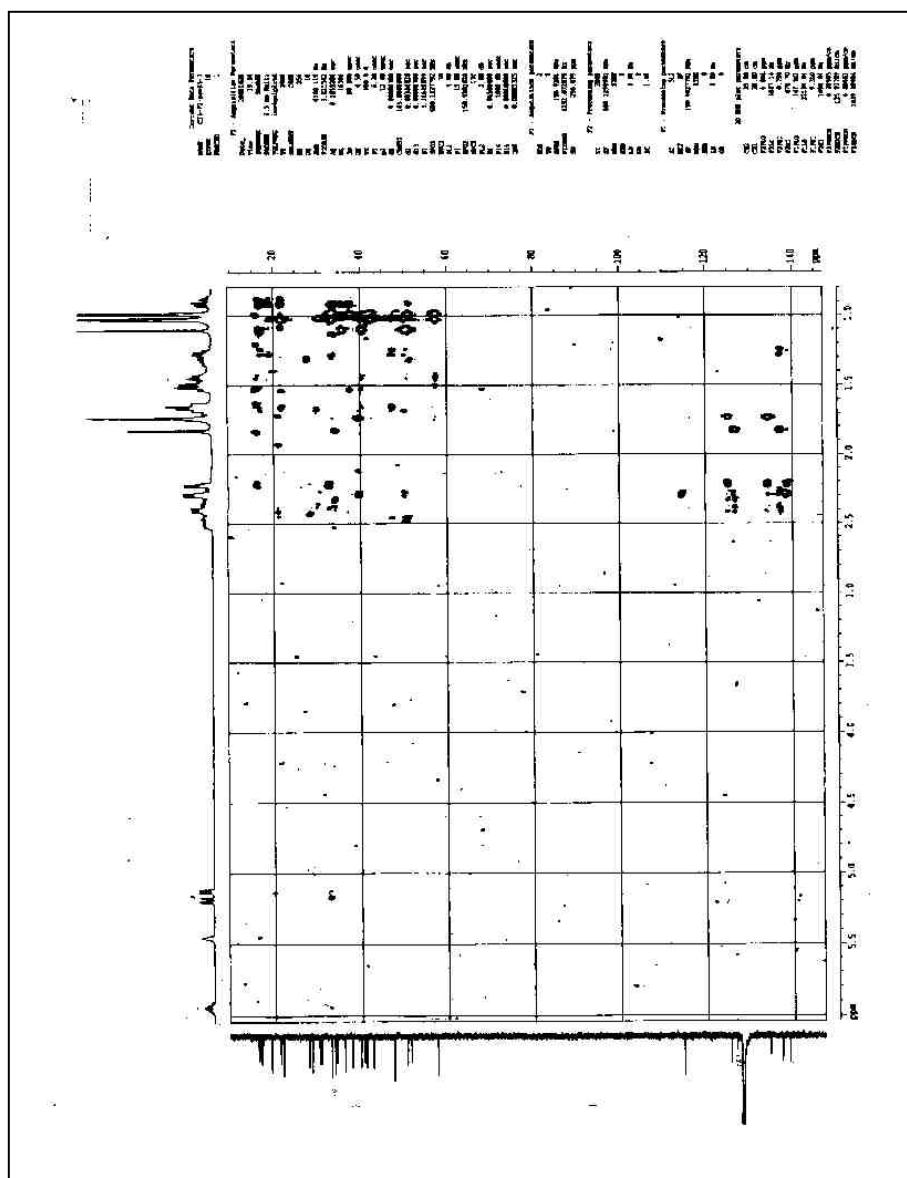

**Product 30**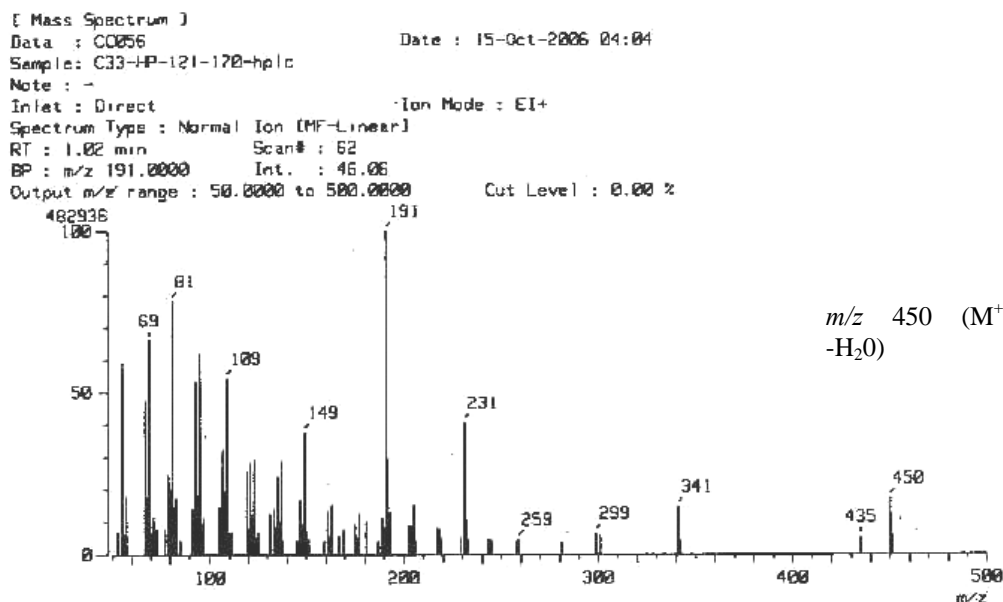**Product 30 (oil)**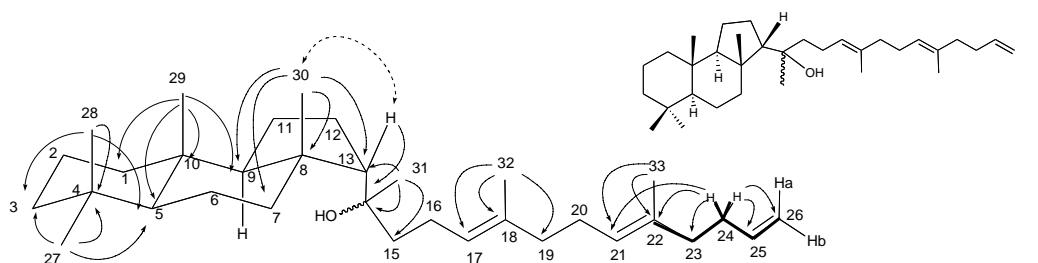

$[\alpha]_D^{25}$  -70.80 (EtOH, c=0.05)

HRMS  $m/z$  450 ( $M^+ - H_2O$ ) Calcd: 450.4226

Found: 450.4228

400MHz in  $C_6D_6$   
 the solvent peak  $^1H$ : 7.28 ppm;  $^{13}C$ : 128.0 ppm

NOE:  $\longleftrightarrow$   
 COSY:  $\longrightarrow$  HMBC:  $\longrightarrow$

| NO. | $^1H$                    | $^{13}C$ | NO. | $^1H$                    | $^{13}C$           | NO. | $^1H$             | $^{13}C$ | NO. | $^1H$                                            | $^{13}C$           |
|-----|--------------------------|----------|-----|--------------------------|--------------------|-----|-------------------|----------|-----|--------------------------------------------------|--------------------|
| 1   | 1.04(1H, m); 1.58(1H, m) | 41.13    | 9   | 1.54(1H, m)              | 60.39              | 17  | 5.42(1H, m)       | 125.4    | 25  | 5.94(1H, m)                                      | 137.6              |
| 2   | 1.47(1H, m); 1.73(1H, m) | 18.89    | 10  | —                        | 37.48              | 18  | —                 | 135.0    | 26  | a:5.21(1H, bdd, 16.8, 2)<br>b:5.13(1H, bd, 10.0) | 114.3              |
| 3   | 1.25(1H, m); 1.50(1H, m) | 42.69    | 11  | 1.47(1H, m); 1.65(1H, m) | 21.70              | 19  | 2.12(1H, bt, 7.0) | 39.67    | 27  | 1.002(3H, s)                                     | 33.68              |
| 4   | —                        | 33.16    | 12  | 1.68(1H, m); 1.94(1H, m) | 24.71              | 20  | 2.27(2H, m)       | 26.63    | 28  | 0.975(3H, s)                                     | 21.54              |
| 5   | 0.99(1H, m)              | 57.13    | 13  | 1.76(1H, m)              | 59.11              | 21  | 5.42(1H, m)       | 121.9    | 29  | 0.982(3H, s)                                     | 16.57              |
| 6   | 1.52(1H, m); 1.73(1H, m) | 20.17    | 14  | —                        | 75.49              | 22  | —                 | 136.5    | 30  | 1.068(3H, s)                                     | 26.83              |
| 7   | 1.94(1H, m); 2.12(1H, m) | 38.32    | 15  | 1.70(1H, m); 2.10(1H, m) | 42.31 <sup>a</sup> | 23  | 2.12(1H, bt, 7.0) | 39.59    | 31  | 1.308(3H, s)                                     | 26.08 <sup>a</sup> |
| 8   | —                        | 45.04    | 16  | 2.27(2H, m)              | 23.23              | 24  | 2.34(2H, m)       | 32.70    | 32  | 1.760(3H, s)                                     | 16.04              |

a: C-31 and C-15 signal are significantly small and broad.





<sup>13</sup>C-NMR

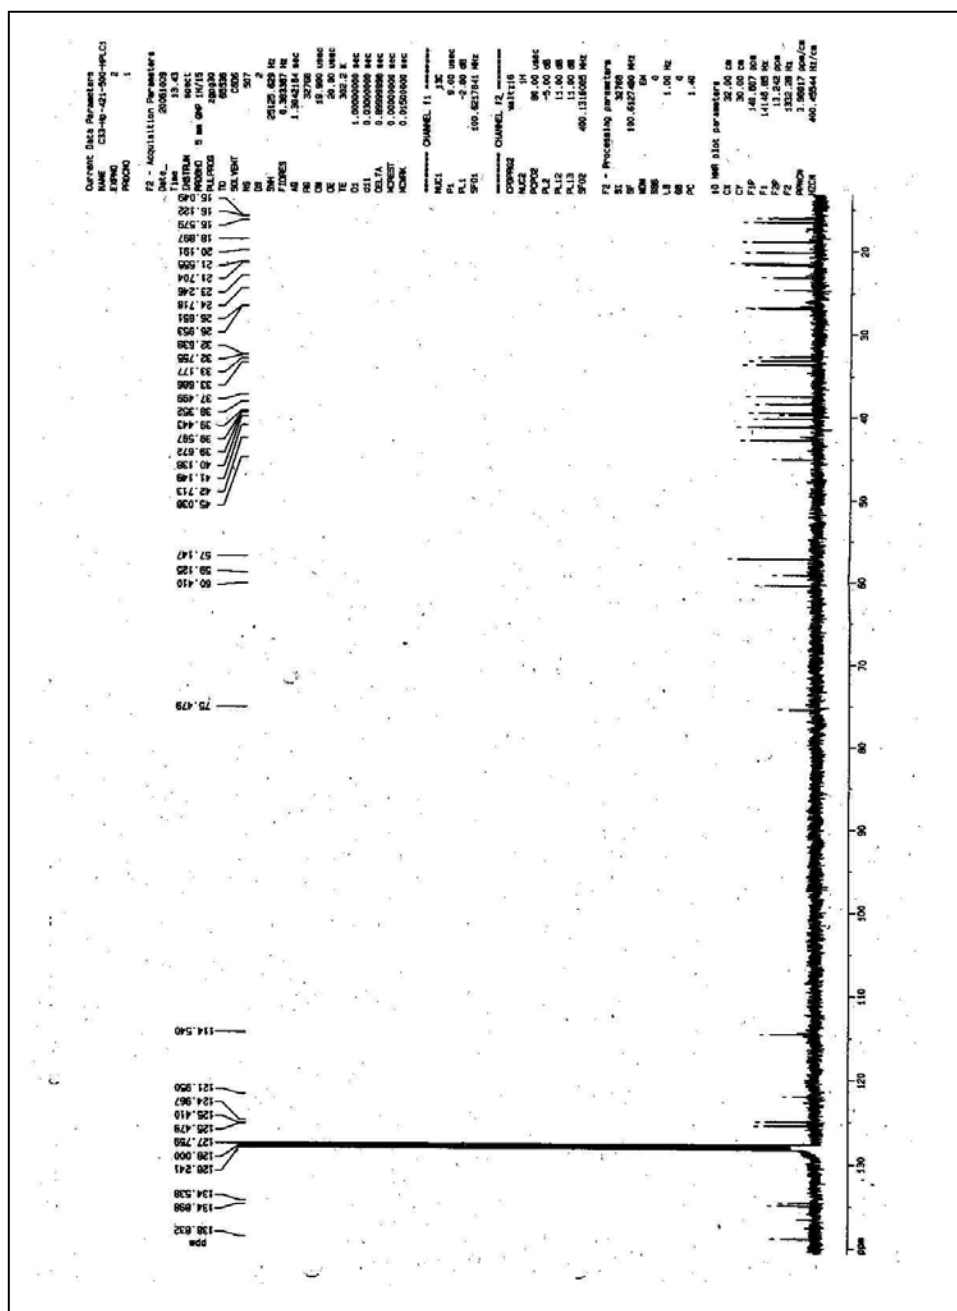

**Product 31**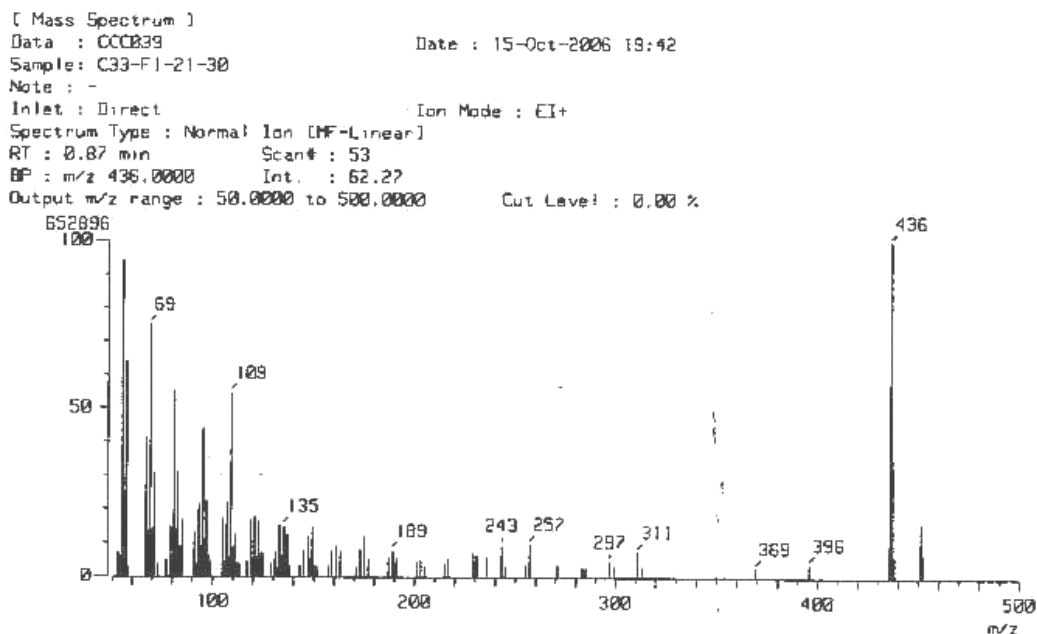**Product 31**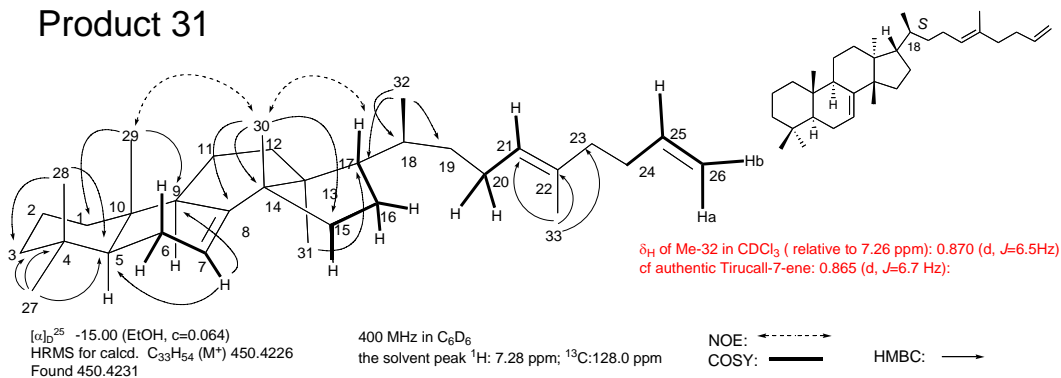

| NO. | $^1\text{H}$             | $^{13}\text{C}$ | NO. | $^1\text{H}$             | $^{13}\text{C}$ | NO. | $^1\text{H}$             | $^{13}\text{C}$ | NO. | $^1\text{H}$                                   | $^{13}\text{C}$ |
|-----|--------------------------|-----------------|-----|--------------------------|-----------------|-----|--------------------------|-----------------|-----|------------------------------------------------|-----------------|
| 1   | 1.05(1H, m); 1.75(1H, m) | 39.27           | 9   | 2.43(1H, m)              | 49.51           | 17  | 1.63(1H, m)              | 53.43           | 25  | 5.94(1H, m)                                    | 138.8           |
| 2   | 1.60(1H, m); 1.68(1H, m) | 18.49           | 10  | —                        | 35.40           | 18  | 1.58(m)                  | 36.29           | 26  | b:5.12(1H, d, J 9.5)<br>a:5.18(1H, bd, J 17.2) | 114.6           |
| 3   | 1.29(1H, m); 1.55(1H, m) | 42.69           | 11  | 1.55(1H, m); 1.69(1H, m) | 19.44           | 19  | 1.27(1H, m); 1.59(1H, m) | 36.58           | 27  | 0.971(3H, s)                                   | 33.16           |
| 4   | —                        | 33.29           | 12  | 1.78(m); 1.89(1H, m)     | 34.16           | 20  | 2.17(1H, m); 2.31(1H, m) | 25.36           | 28  | 1.034(3H, s)                                   | 21.50           |
| 5   | 1.50(1H, m)              | 51.67           | 13  | —                        | 43.84           | 21  | 5.42(1H, t, J 6.4)       | 125.9           | 29  | 0.965(3H, s)                                   | 13.36           |
| 6   | 1.97(1H, m); 2.25(1H, m) | 24.71           | 14  | —                        | 51.60           | 22  | —                        | 134.1           | 30  | 1.186(3H, s)                                   | 27.56           |
| 7   | 5.47(1H, bs)             | 118.5           | 15  | 1.65(1H, m); 1.78(1H, m) | 34.46           | 23  | 2.24(2H, m)              | 39.50           | 31  | 1.058(3H, s)                                   | 22.26           |
| 8   | —                        | 146.0           | 16  | 1.40(1H, m); 2.12(1H, m) | 28.62           | 24  | 2.28(2H, m)              | 32.75           | 32  | 1.107(3H, d, 6.0Hz)                            | 18.63           |
|     |                          |                 |     |                          |                 |     |                          |                 | 33  | 1.730(3H, s)                                   | 15.99           |

The assignments of the proton and carbon at 12 and 15 position may be exchangeable



<sup>13</sup>C-NMR

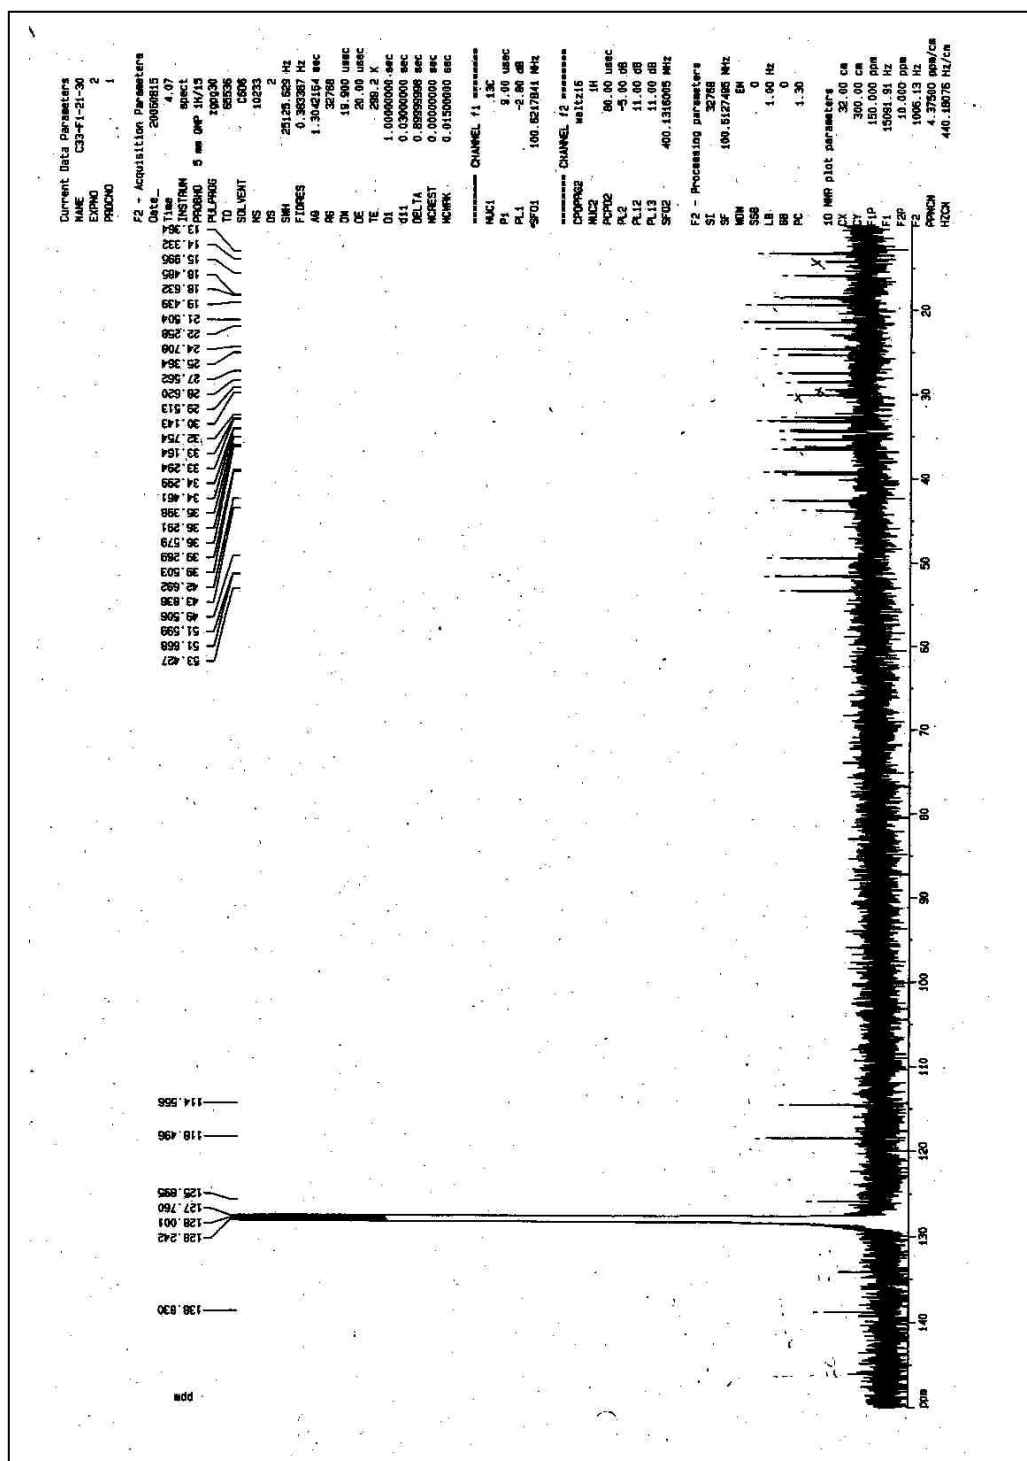

**Product 32**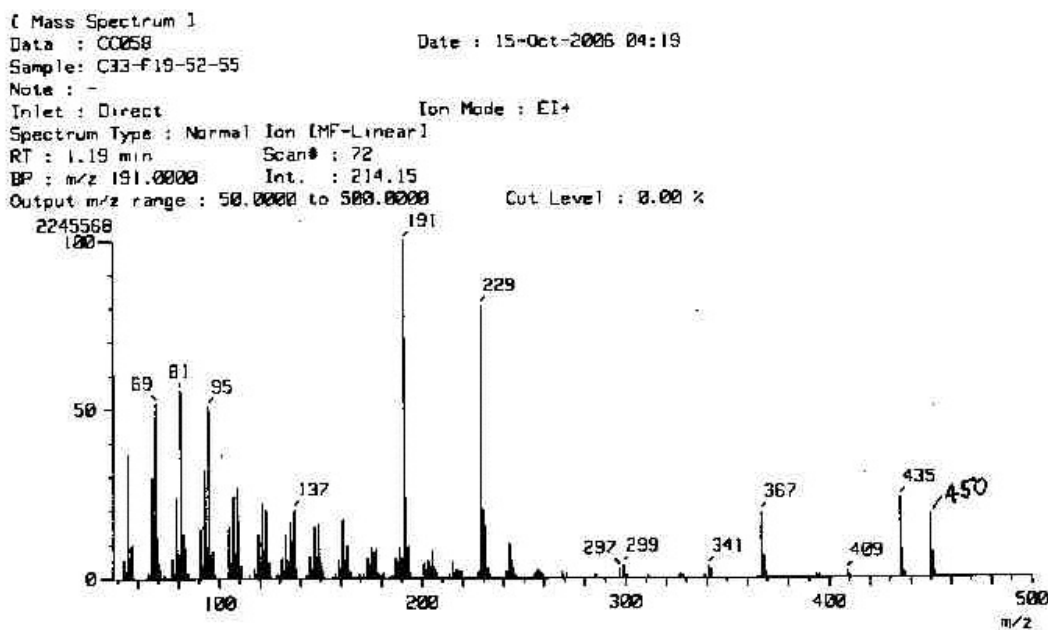**Product 32**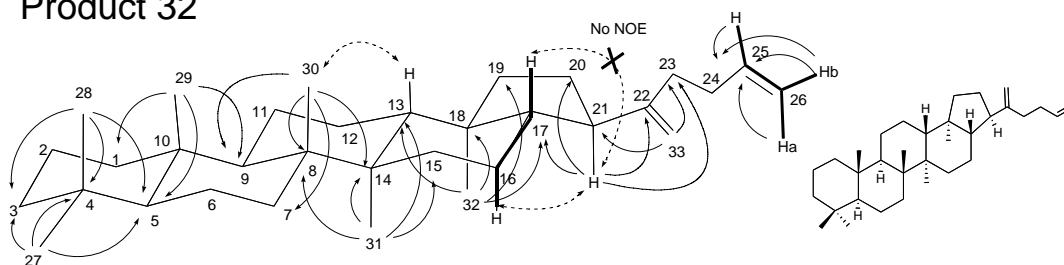

$[\alpha]_D^{25}$  -52.39 (EtOH, c=0.046)  
 HRMS for calcd.  $C_{33}H_{54}$  ( $M^+$ ) 450.4226  
 Found 450.4213

600 MHz, the solvent peak of  $C_6D_6$   
 7.28 ppm for  $^1H$ - and 128.0 ppm for  $^{13}C$ -NMR

NOE:  $\dashrightarrow$   
 COSY:  $\longrightarrow$  HMBC:  $\longrightarrow$

| NO. | $^1H$                    | $^{13}C$ | NO. | $^1H$                    | $^{13}C$ | NO. | $^1H$                    | $^{13}C$ | NO. | $^1H$                                           | $^{13}C$ |
|-----|--------------------------|----------|-----|--------------------------|----------|-----|--------------------------|----------|-----|-------------------------------------------------|----------|
| 1   | 0.87(1H, m); 1.78(1H, m) | 40.71    | 9   | 1.41(1H, m)              | 50.98    | 17  | 1.28(1H, m)              | 55.12    | 25  | 5.96(1H, m)                                     | 138.8    |
| 2   | 1.42(1H, m); 1.63(1H, m) | 19.10    | 10  | —                        | 37.76    | 18  | —                        | 44.55    | 26  | a: 5.20(1H, bd, 17.1, b: 5.13 (1H, bd, 10.5 Hz) | 114.7    |
| 3   | 1.25(1H, m); 1.51(1H, m) | 42.45    | 11  | 1.30(1H, m); 1.42(1H, m) | 21.38    | 19  | 1.19(1H, m); 1.63(1H, m) | 40.47    | 27  | 1.037(3H, s)                                    | 33.62    |
| 4   | —                        | 33.44    | 12  | 1.55(1H, m); 1.64(1H, m) | 24.35    | 20  | 1.58(1H, m); 2.06(1H, m) | 29.03    | 28  | 0.989(3H, s)                                    | 21.85    |
| 5   | 0.91(1H, m)              | 56.60    | 13  | 1.58(1H, m)              | 49.20    | 21  | 2.41(1H, m)              | 47.46    | 29  | 0.979(3H, s)                                    | 16.13    |
| 6   | 1.51(1H, m); 1.72(1H, m) | 19.13    | 14  | —                        | 42.27    | 22  | —                        | 151.9    | 30  | 1.106(3H, s)                                    | 17.03    |
| 7   | 1.35(1H, m); 1.61(1H, m) | 33.80    | 15  | 1.33(1H, m); 1.54(1H, m) | 33.14    | 23  | 2.24(2H, t, 7.7Hz)       | 34.43    | 31  | 1.114(3H, s)                                    | 16.96    |
| 8   | —                        | 42.63    | 16  | 1.65(1H, m); 1.72(1H, m) | 21.42    | 24  | 2.37(2H, m)              | 32.96    | 32  | 0.845(3H, s)                                    | 15.42    |
|     |                          |          |     |                          |          |     |                          |          | 33  | 5.00(1H, bs); 5.07(1H, bs)                      | 108.2    |

The carbon assignments between 11 and 16-positions, between 2 and 6-positions and between 30 and 31 may be interchangeable



<sup>13</sup>C-NMR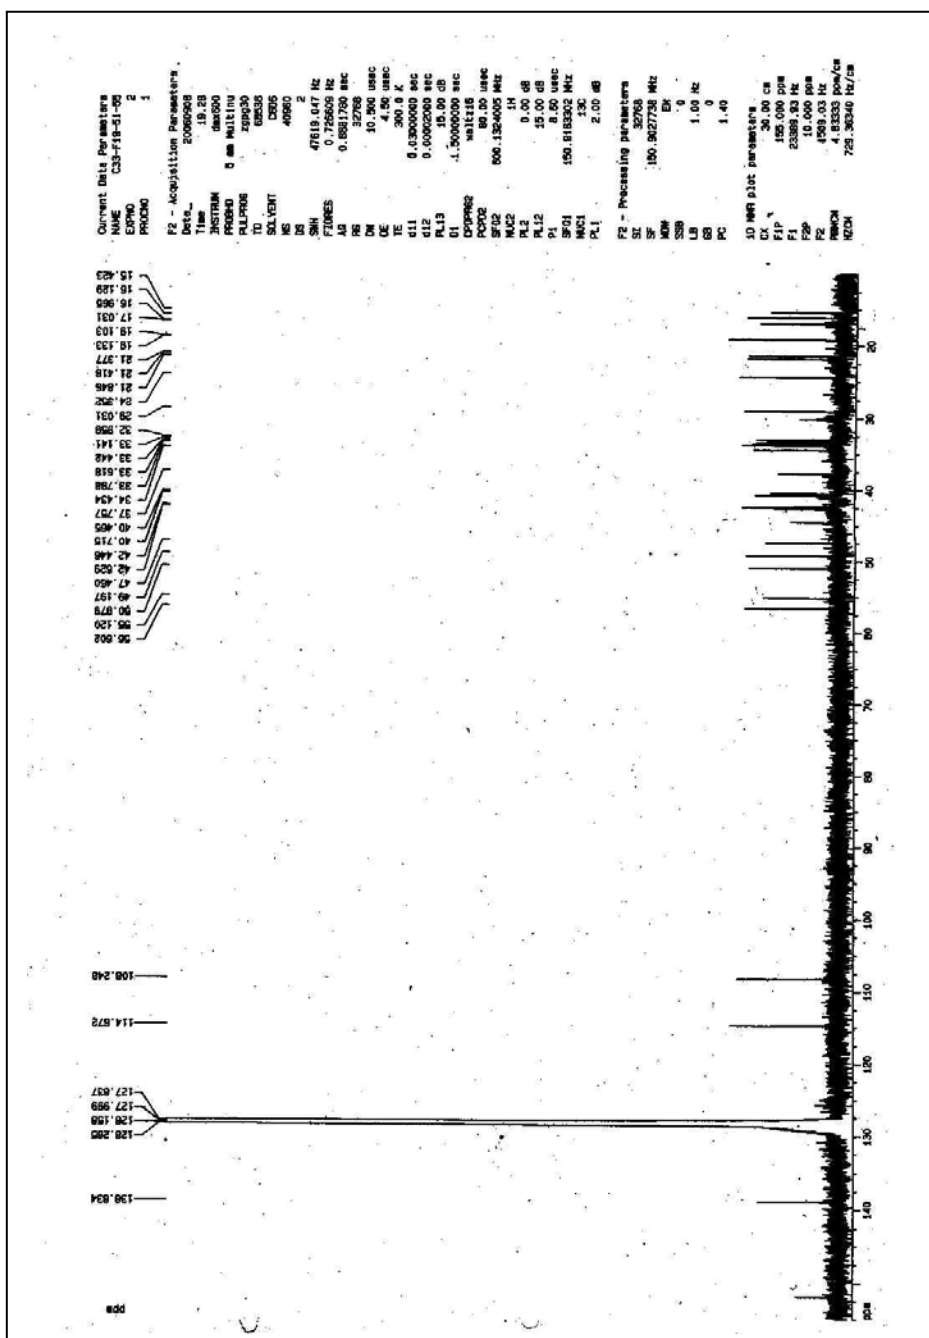

**Product 33**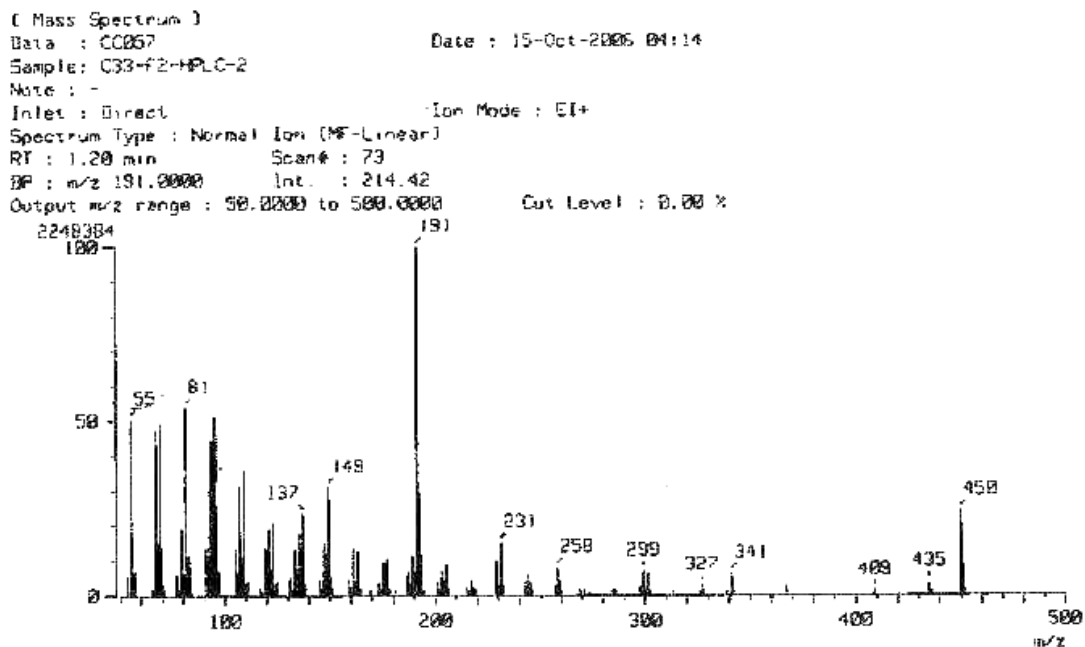**Product 33**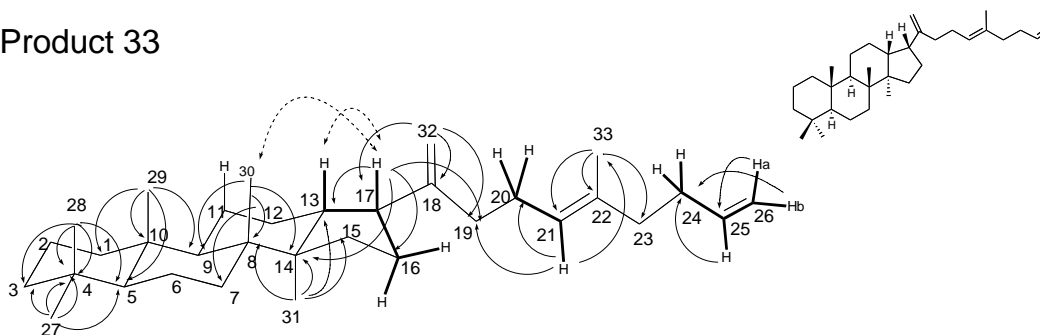

$[\alpha]_D^{25}$  -51.64 (c=0.056, EtOH)  
 HRMS for calcd.  $C_{33}H_{54}$  ( $M^+$ ) 450.4226  
 Found 450.4229

600 MHz, the solvent peak of  $C_6D_6$   
 7.28 ppm for  $^1H$ - and 128.0 ppm for  $^{13}C$ -NMR

NOE:  $\longleftrightarrow$   
 COSY:  $\longrightarrow$  HMBC:  $\longrightarrow$

| NO. | $^1H$                    | $^{13}C$ | NO. | $^1H$                    | $^{13}C$ | NO. | $^1H$                    | $^{13}C$ | NO. | $^1H$                                               | $^{13}C$ |
|-----|--------------------------|----------|-----|--------------------------|----------|-----|--------------------------|----------|-----|-----------------------------------------------------|----------|
| 1   | 0.88(1H, m); 1.75(1H, m) | 40.98    | 9   | 1.48(1H, m)              | 51.46    | 17  | 2.74(1H, m)              | 44.51    | 25  | 5.93 (1H, m)                                        | 138.8    |
| 2   | 1.48(1H, m); 1.65(1H, m) | 19.11    | 10  | —                        | 37.81    | 18  | —                        | 152.2    | 26  | a: 5.17 (1H, bd, 16.9Hz)<br>b: 5.12 (1H, d, 10.1Hz) | 114.5    |
| 3   | 1.25(1H, m); 1.50(1H, m) | 42.50    | 11  | 1.27(1H, m); 1.70(1H, m) | 22.26    | 19  | 2.36(1H, m); 2.20(1H, m) | 39.05    | 27  | 1.017(3H, s)                                        | 33.60    |
| 4   | —                        | 33.56    | 12  | 1.45(1H, m); 1.83(1H, m) | 25.52    | 20  | 2.42(1H, m); 2.35(1H, m) | 27.68    | 28  | 0.989(3H, s)                                        | 21.79    |
| 5   | 0.910(1H, bd, 12.1Hz)    | 57.39    | 13  | 2.06(1H, m)              | 45.12    | 21  | 5.41(1H, bs)             | 125.2    | 29  | 1.003(3H, s)                                        | 16.47    |
| 6   | 1.48(1H, m); 1.65(1H, m) | 19.11    | 14  | —                        | 50.27    | 22  | —                        | 134.6    | 30  | 1.077(3H, s)                                        | 16.09    |
| 7   | 1.40(1H, m); 1.72(1H, m) | 35.48    | 15  | 1.34(1H, m); 1.68(1H, m) | 33.46    | 23  | 2.36(1H, m); 2.20(1H, m) | 39.47    | 31  | 1.131(3H, s)                                        | 17.24    |
| 8   | —                        | 41.41    | 16  | 1.93(1H, m); 2.03(1H, m) | 28.82    | 24  | 2.27(1H, m); 2.21(1H, m) | 32.76    | 32  | 5.21(1H, s); 5.19(1H, s)                            | 109.5    |
|     |                          |          |     |                          |          |     |                          |          | 33  | 1.699(3H, s)                                        | 16.20    |



<sup>1</sup>H-NMR

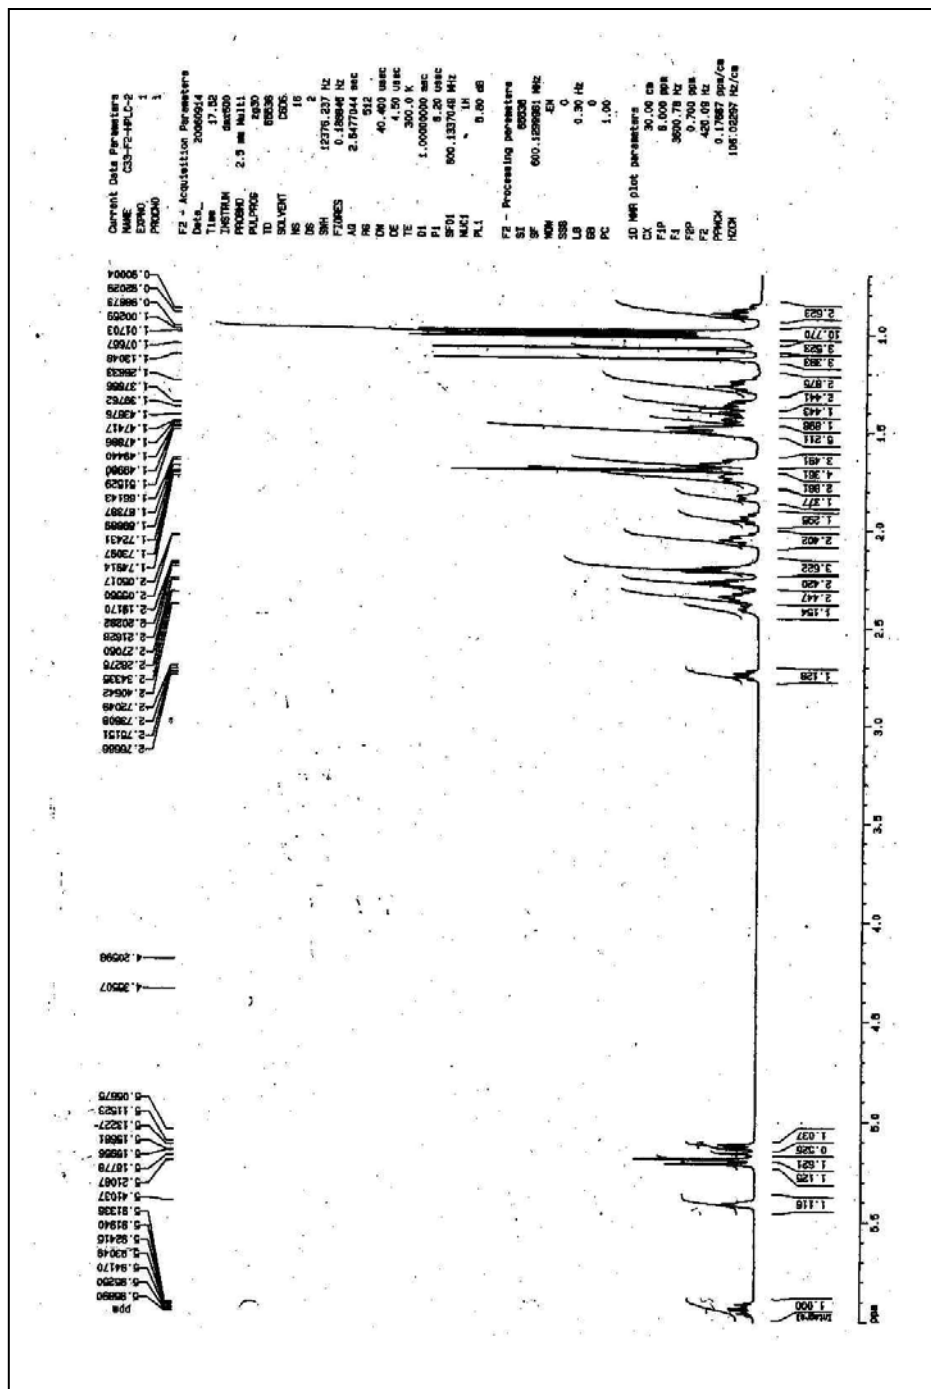

<sup>13</sup>C-NMR

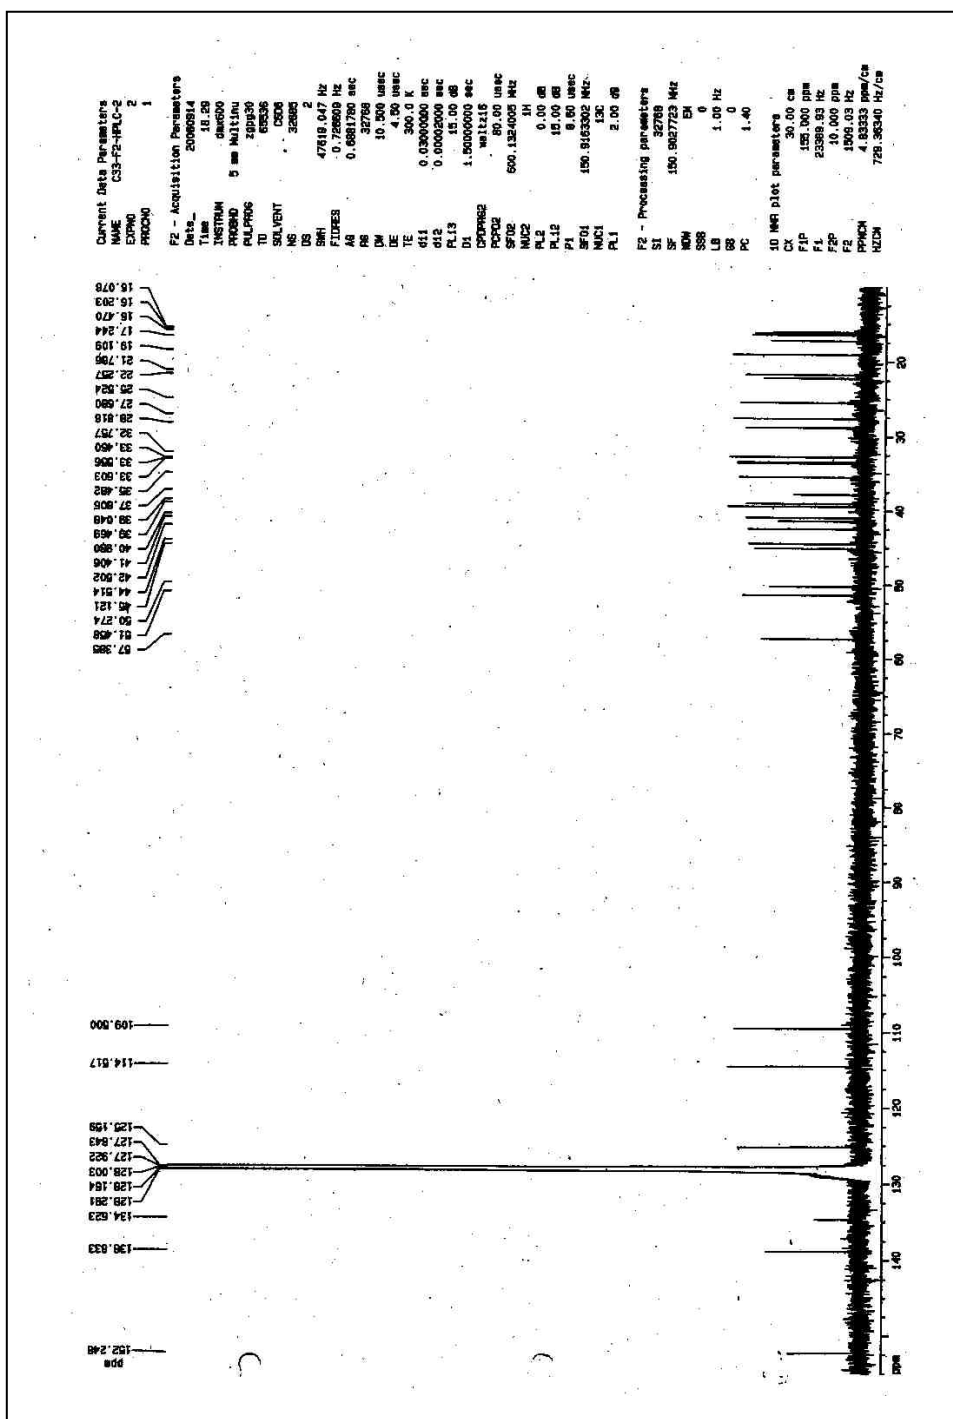

**Product 34**

[ Mass Spectrum ]  
 Data : ccj050 Date : 23-Nov-2006 06:04  
 Sample: C33-tp-161-180  
 Note : -  
 Inlet : Direct Ion Mode : EI+  
 Spectrum Type : Normal Ion [MF-Linear]  
 RT : 0.85 min Scan# : 52  
 BP : m/z 191.0000 Int. : 27.45  
 Output m/z range : 50.0000 to 500.0000 Cut Level : 0.00 %

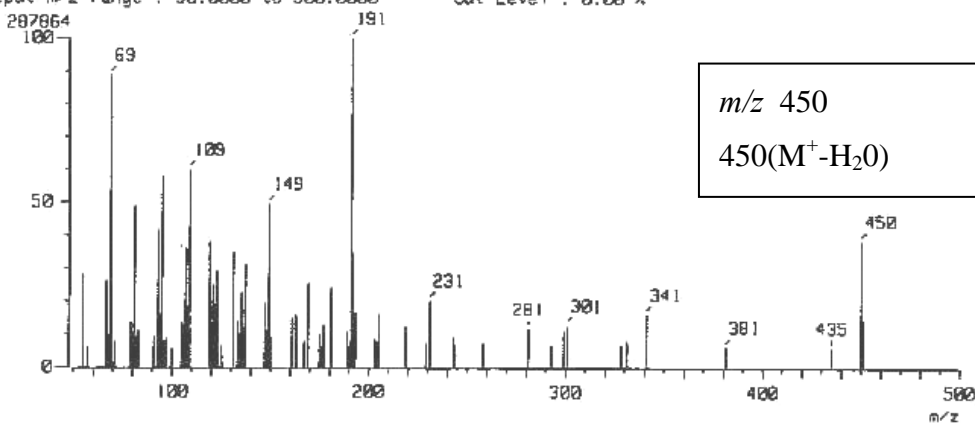**Product 34**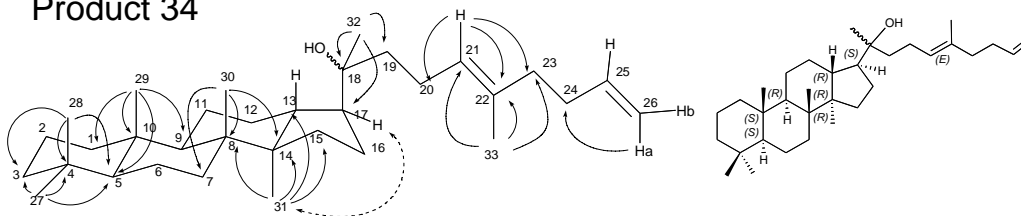

$[\alpha]_D^{25}$  +20.28 (EtOH, c=0.036)  
 HRMS for calcd.  $C_{33}H_{54}$  ( $M^+ - H_2O$ ) 450.4226  
 Found 450.4247

600 MHz, the solvent peak of  $C_6D_6$   
 7.28 ppm for  $^1H$ - and 128.0 ppm for  $^{13}C$ -NMR

NOE:  $\longleftrightarrow$  HMBC:  $\longrightarrow$   
 COSY:  $\longrightarrow$

| NO. | $^1H$                    | $^{13}C$ | NO. | $^1H$                    | $^{13}C$ | NO. | $^1H$            | $^{13}C$ | NO. | $^1H$                                             | $^{13}C$ |
|-----|--------------------------|----------|-----|--------------------------|----------|-----|------------------|----------|-----|---------------------------------------------------|----------|
| 1   | 0.88(1H, m); 1.75(1H, m) | 40.89    | 9   | 1.46(1H, m)              | 51.20    | 17  | 1.80(1H, m)      | 50.40    | 25  | 5.93(1H, m)                                       | 138.8    |
| 2   | 1.48(1H, m); 1.62(1H, m) | 19.00    | 10  | —                        | 37.70    | 18  | —                | 74.77    | 26  | Ha: 5.19(1H, bd, 17.2);<br>Hb: 5.13(1H, bd, 10.4) | 114.6    |
| 3   | 1.27(1H, m); 1.48(1H, m) | 42.48    | 11  | 1.27(1H, m); 1.61(1H, m) | 21.76    | 19  | 1.66(2H, m)      | 40.98    | 27  | 1.029(3H, s)                                      | 33.63    |
| 4   | —                        | 33.52    | 12  | 1.66(1H, m); 1.72(1H, m) | 25.18    | 20  | 2.26(2H, m)      | 22.93    | 28  | 0.988(3H, s)                                      | 21.76    |
| 5   | 0.93(1H, dd, 12.0, 1.6)  | 57.34    | 13  | 1.81(1H, m)              | 42.48    | 21  | 5.40(1H, t, 7.2) | 125.7    | 29  | 0.978(3H, s)                                      | 16.43    |
| 6   | 1.48(1H, m); 1.62(1H, m) | 19.09    | 14  | —                        | 50.62    | 22  | —                | 134.4    | 30  | 1.103(3H, s)                                      | 15.79    |
| 7   | 1.37(1H, m); 1.68(1H, m) | 35.64    | 15  | 1.19(1H, m); 1.62(1H, m) | 31.55    | 23  | 2.19(2H, m)      | 39.44    | 31  | 1.022(3H, s)                                      | 16.73    |
| 8   | —                        | 40.89    | 16  | 1.32(1H, m); 2.03(1H, m) | 28.02    | 24  | 2.22(2H, m)      | 32.70    | 32  | 1.226(3H, s)                                      | 25.82    |
|     |                          |          |     |                          |          |     |                  |          | 33  | 1.729(3H, s)                                      | 16.03    |

1. The assignments of H2 and H6 and those of C2 and C6 may be exchangeable.  
 2. C15 and C24 are exchangeable due to the close values of chemical shifts.

3. The assignments of C11, C12 and C16 may be exchangeable together with H11, H12 and H16.  
 4. The assignments of C1 and C19 may be exchangeable due to the close chemical shifts.

$^1\text{H-NMR}$

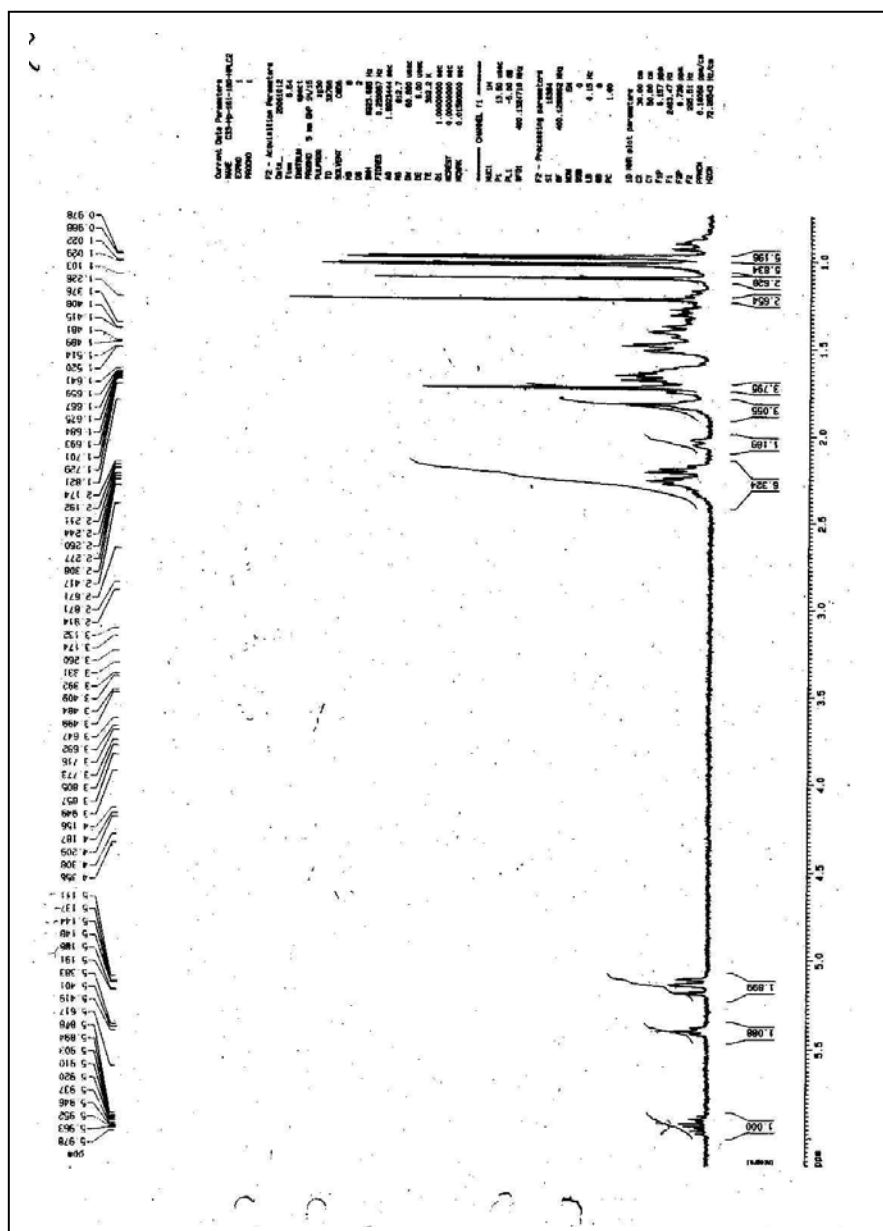



**Product 35**

[ Mass Spectrum ]  
 Data : CC054 Date : 15-Oct-2009 03:49  
 Sample: C33-HP-261-340  
 Note : -  
 Inlet : Direct Ion Mode : EI+  
 Spectrum Type : Normal Ion (MF-Linear)  
 RT : 1.73 min Scan# : 105  
 BP : m/z 191.0000 Int. : 151.83  
 Output m/z range : 50.0000 to 500.0000 Cut Level : 0.00 %

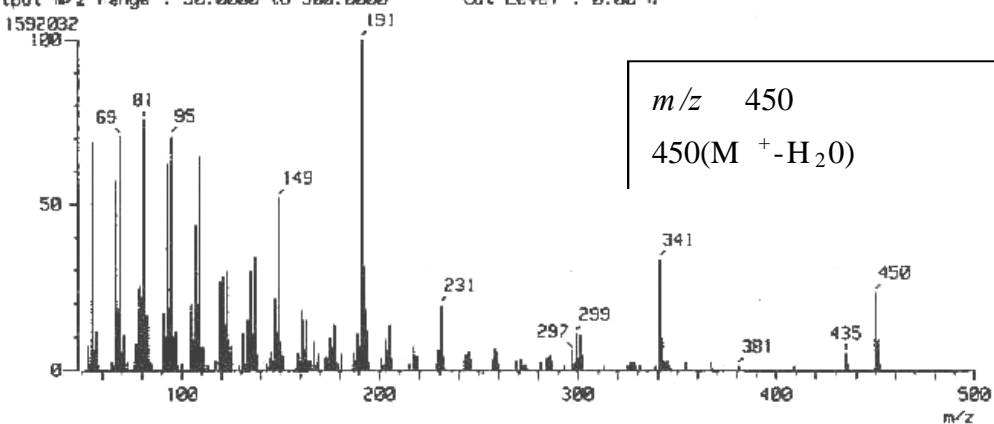**Product 35**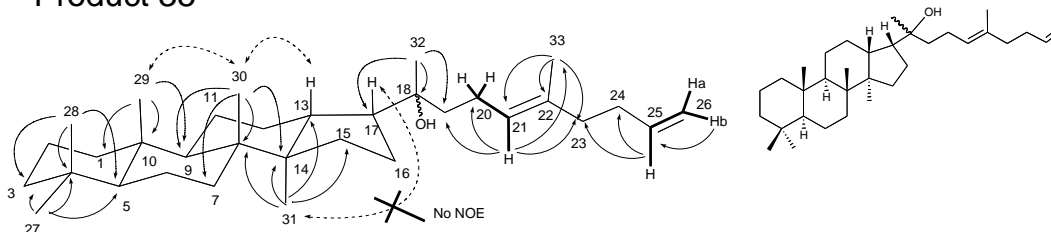

$[\alpha]_D^{25}$  -18.21 (EtOH, c=0.2)

HRMS for calcd.  $C_{33}H_{54}$  ( $M^+ - H_2O$ ) 450.4226  
 Found 450.4247

400 MHz, the solvent peak of  $C_6D_6$   
 7.28 ppm for  $^1H$ - and 128.0 ppm for  $^{13}C$ -NMR

NOE:  $\dashrightarrow$  COSY:  $\longrightarrow$  HMBC:  $\dashrightarrow$

| NO. | $^1H$                    | $^{13}C$ | NO. | $^1H$                    | $^{13}C$ | NO. | $^1H$            | $^{13}C$ | NO. | $^1H$                                                  | $^{13}C$ |
|-----|--------------------------|----------|-----|--------------------------|----------|-----|------------------|----------|-----|--------------------------------------------------------|----------|
| 1   | 0.92(1H, m); 1.77(1H, m) | 40.88    | 9   | 1.54(1H, m)              | 51.14    | 17  | 2.10(1H, m)      | 48.38    | 25  | 5.91(1H, m)                                            | 138.8    |
| 2   | 1.49(1H, m); 1.67(1H, m) | 19.11    | 10  | —                        | 37.71    | 18  | —                | 74.59    | 26  | Hb: 5.12(1H, bd, 10.0 Hz)<br>Ha: 5.17(1H, bd, 16.8 Hz) | 114.6    |
| 3   | 1.31(1H, m); 1.51(1H, m) | 42.49    | 11  | 1.22(1H, m); 1.68(1H, m) | 22.88    | 19  | 1.62(2H, m)      | 42.67    | 27  | 1.025(3H, s)                                           | 33.62    |
| 4   | —                        | 33.54    | 12  | 1.64(1H, m); 2.04(1H, m) | 26.42    | 20  | 2.21(2H, m)      | 23.42    | 28  | 0.994(3H, s)                                           | 21.78    |
| 5   | 0.94(1H, dd, 12.0, 2.0)  | 57.34    | 13  | 2.13(1H, m)              | 44.07    | 21  | 5.37(1H, t, 6.0) | 125.6    | 29  | 1.008(3H, s)                                           | 16.50    |
| 6   | 1.52(1H, m); 1.75(1H, m) | 19.15    | 14  | —                        | 49.48    | 22  | —                | 134.4    | 30  | 1.092(3H, s)                                           | 16.17    |
| 7   | 1.41(1H, m); 1.73(1H, m) | 35.73    | 15  | 1.26(1H, m); 1.56(1H, m) | 32.76    | 23  | 2.20(2H, m)      | 39.43    | 31  | 1.218(3H, s)                                           | 17.16    |
| 8   | —                        | 41.19    | 16  | 1.77(2H, m)              | 26.75    | 24  | 2.26(2H, m)      | 32.72    | 32  | 1.308(3H, s)                                           | 27.69    |
|     |                          |          |     |                          |          |     |                  |          | 33  | 1.722(3H, s)                                           | 16.03    |

1. The assignments of H2 and H6 and those of C2 and C6 may be exchangeable.  
 2. C15 and C24 are exchangeable due to the close chemical shifts.

3. The assignments of C11, C12 and C16 may be exchangeable together with H11, H12 and H16

$^1\text{H-NMR}$

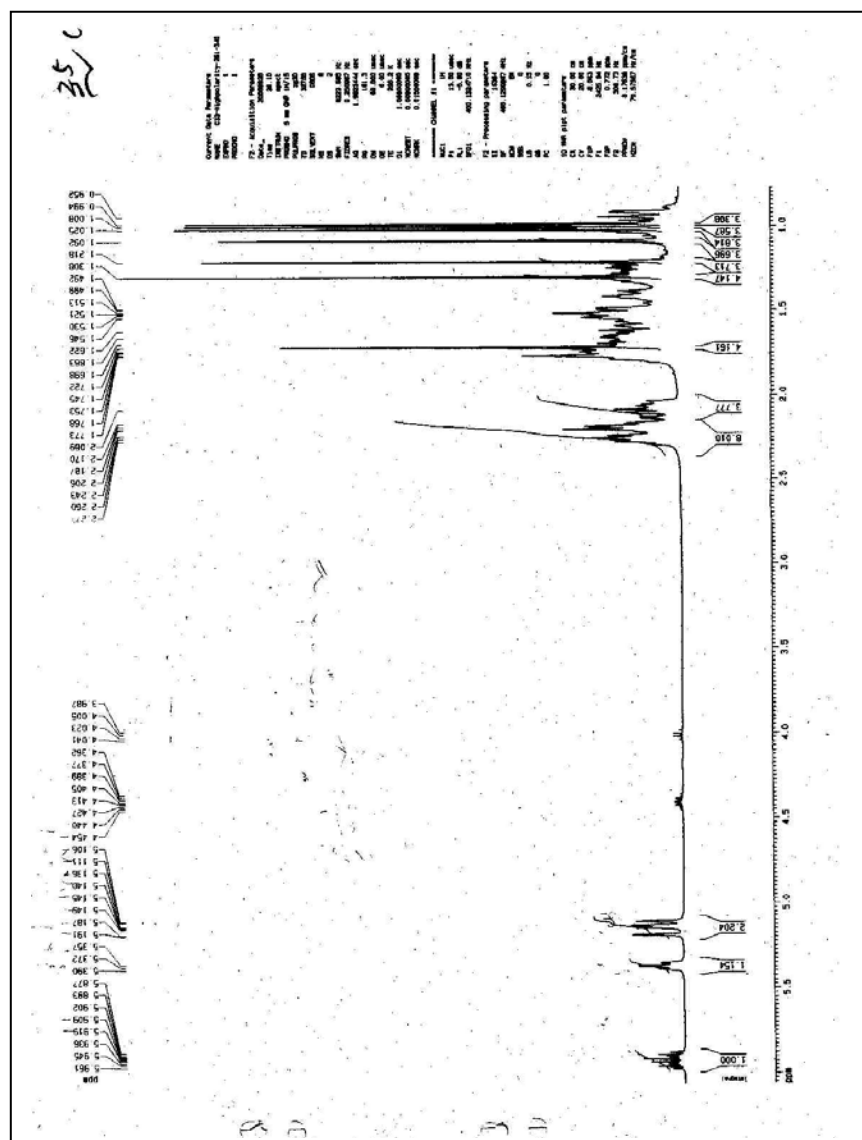

Supplement: b823167b.pdf [file b823167b.pdf]
